1 **The endoplasmic reticulum-resident protein TMEM-120/TMEM120A promotes fat**  
2 **storage in *C. elegans* and mammalian cells**

3

4 Yan Li<sup>1</sup>, Siwei Huang<sup>1</sup>, Xuesong Li<sup>2</sup>, Xingyu Yang<sup>1</sup>, Ningyi Xu<sup>3</sup>, Jianan Qu<sup>2</sup>, Ho Yi Mak<sup>1,\*</sup>

5

6 1. Division of Life Science, The Hong Kong University of Science and Technology, Hong  
7 Kong SAR, China.

8 2. Biophotonics Research Laboratory, Department of Electronic and Computer Engineering,  
9 The Hong Kong University of Science and Technology, Hong Kong SAR, China.

10 3. The MOE Key Laboratory of Biosystems Homeostasis & Protection and Innovation Center  
11 for Cell Signaling Network, Life Sciences Institute, Zhejiang University, Hangzhou,  
12 Zhejiang, China.

13

14

15 \* Corresponding author: [hym@ust.hk](mailto:hym@ust.hk) ORCID: 0000-0002-1500-5328

16

17 **Keywords:** TMEM-120, TMEM120A, endoplasmic reticulum, lipid droplets

18 **Abstract**

19 The synthesis of triacylglycerol (TAG) is essential for the storage of excess fatty acids, which  
20 can subsequently be used for energy or cell growth. A series of enzymes act in the  
21 endoplasmic reticulum (ER) to synthesize TAG, prior to its transfer to lipid droplets (LDs),  
22 which are conserved organelles for fat storage. Here, we report that the deficiency of TMEM-  
23 120/TMEM120A, a protein with 6-transmembrane helices, retards TAG synthesis and LD  
24 expansion in *C. elegans*. GFP fusion proteins of TMEM-120, expressed at the endogenous  
25 level in live worms, were observed throughout the ER network. Using Stimulated Raman  
26 Scattering, we demonstrated the specific requirement of TMEM-120 in the storage of  
27 exogenous fatty acids in LDs. Knockdown of TMEM120A impedes adipogenesis of pre-  
28 adipocytes in vitro, while its over-expression is sufficient to promote LD expansion in  
29 mammalian cells. Our results suggest that TMEM-120/TMEM120A plays a conserved role in  
30 increasing the efficiency of TAG synthesis.

## 31 **Introduction**

32 Excess fatty acids from de novo lipogenesis or the diet can be incorporated into  
33 neutral fat, such as triacylglycerol (TAG), via the glycerol-3-phosphate (G3P) or the  
34 monoacylglycerol (MAG) pathway (Yen et al., 2008). Common to both pathways is the  
35 addition of fatty acyl-Coenzyme-A (acyl-CoA) molecules to specific positions of the glycerol  
36 backbone, by acyltransferases (Coleman and Lee, 2004). Based on biochemical and imaging  
37 analyses, all TAG biosynthetic enzymes can be found in the endoplasmic reticulum (ER).  
38 Accordingly, newly synthesized TAG accumulates between ER membrane leaflets before the  
39 directional budding of the cytoplasmic leaflet to form nascent lipid droplets (LDs), which are  
40 conserved organelles for fat storage (Henne et al., 2018; Thiam and Ikonen, 2021; Walther et  
41 al., 2017). Additional TAG synthesis occurs at ER-LD contacts to support LD expansion  
42 (Cao and Mak, 2020; Olzmann and Carvalho, 2019; Schuldiner and Bohnert, 2017).  
43 Although the core ensemble of TAG biosynthetic enzymes have been well-defined, it is  
44 unknown if additional proteins are required for the maximal efficiency of TAG synthesis.

45 TMEM120A (alternatively known as NET29 or TACAN) is a member of a conserved  
46 family of transmembrane proteins that had been assigned seemingly unrelated functions. It  
47 was first reported in a proteomic study of the nuclear envelop (Schirmer et al., 2003).  
48 Subsequent functional analysis indicates that TMEM120A, and its paralog TMEM120B, is  
49 required for the differentiation of 3T3-L1 pre-adipocytes into mature adipocytes (Batrakou et  
50 al., 2015). More recently, TMEM120A was reported to act at the cell surface as an ion  
51 channel that is sensitive to mechanical cues (Beaulieu-Laroche et al., 2020). However, four  
52 independent studies did not support such conclusion (Ke et al., 2021; Niu et al., 2021; Rong  
53 et al., 2021; Xue et al., 2021). Instead, structural and biochemical analyses indicate that  
54 TMEM120A forms a symmetrical homodimer and each protomer binds specifically to a  
55 coenzyme-A (CoASH) molecule (Niu et al., 2021; Rong et al., 2021; Xue et al., 2021). These

56 observations led to the proposal that TMEM120A has an undefined role in lipid metabolism,  
57 which correlates with its requirement for adipogenesis (Batrakou et al., 2015; Czapiewski et  
58 al., 2021).

59 We identified mutant worms that were deficient of the sole *C. elegans* ortholog of  
60 TMEM120A from an unbiased forward genetic screen. Here, we present evidence that *C.*  
61 *elegans* TMEM-120 acts at the ER to promote TAG synthesis.

## 62 **Results and Discussion**

### 63 **TMEM-120 is required for TAG accumulation and LD expansion**

64 We have previously shown that lipid droplets (LDs) undergo continuous expansion in  
65 *C. elegans daf-22*/thiolase mutant worms, owing to a block in the peroxisomal  $\beta$ -oxidation  
66 pathway (Zhang et al., 2010). These worms accumulate more triacylglycerol (TAG), which is  
67 synthesized by the concerted action of ACS-22/acyl-CoA synthetase and DGAT-  
68 2/diacylglycerol acyltransferase (Xu et al., 2012). Accordingly, loss of *acs-22* or *dgat-2*  
69 function attenuates LD expansion of *daf-22* mutant worms. In a genetic screen for additional  
70 *daf-22* suppressors, we identified a complementation group that consisted of two recessive  
71 alleles, *hj49* and *hj50*. Molecular cloning revealed lesions in a gene annotated as M01G5.3,  
72 hereafter named *tmem-120*, which encodes a predicted transmembrane protein that is  
73 homologous to mammalian TMEM120A and TMEM120B (Batrakou et al., 2015) (Fig. S1A).  
74 The *hj50* nonsense allele (Glutamine 290 to amber) caused ~90% reduction of *tmem-120*  
75 mRNA level (Fig. S1A-B), possibly due to nonsense mediated decay. Therefore, it is a strong  
76 loss of function allele. The *hj49* missense allele caused the substitution of a conserved  
77 Glycine to Glutamate (G195E) (Fig. S1A). Based on the recently determined structures of  
78 TMEM120A, this conserved Glycine residue locates in a flexible linker immediately N-  
79 terminal to a coenzyme-A (CoASH) binding site (Niu et al., 2021; Rong et al., 2021; Xue et  
80 al., 2021). Therefore, its replacement with Glutamate may alter the conformation of the linker  
81 and in turn affect the orientation of residues that constitute the CoASH binding site (including  
82 W193 of human TMEM120A and W197 of *C. elegans* TMEM-120). Since the phenotypes of  
83 mutant worms carrying *hj49* and *hj50* were indistinguishable (Fig. S1C-E), we concluded that  
84 the G195E substitution severely compromised TMEM-120 function. In subsequent  
85 experiments, we used worms carrying the *hj50* nonsense allele for phenotypic analysis.

86 To visualize LDs of wild type and mutant animals, we used a recently developed  
87 Stimulated Raman Scattering (SRS) microscopy system (Li et al., 2015). We focused on  
88 detecting C-H bond vibration from TAG, which was highly concentrated in LDs. In  
89 agreement with previous results based on the use of vital dye or fluorescent protein markers  
90 (Xu et al., 2012), LDs in *daf-22* mutant worms were larger than those in wild type worms  
91 (Fig. 1A). The loss of TMEM-120 function reduced LD size and blocked LD expansion in  
92 wild type and *daf-22* mutant worms (Fig. 1A and C). Similar results were observed when we  
93 used DHS-3::mRuby as a fluorescent LD marker (Zeng et al., 2020) (Fig. 1F). Next, we  
94 quantified SRS signals, which were proportional to TAG content (Wang et al., 2011). We  
95 detected 23% more SRS signals in *daf-22* mutant than wild type worms (Fig. 1B and D). In  
96 contrast, *tmem-120* and *daf-22; tmem-120* mutant worms have 26% and 14% less SRS signals  
97 than wild type worms, respectively (Fig. 1B and D). To complement our imaging approach,  
98 we used liquid chromatography-mass spectrometry (LC-MS) to determine that *tmem-120*  
99 mutant worms had almost 40% less TAG than wild type worms (Fig. 1E). Such reduction of  
100 TAG was unlikely due to an alteration of feeding rate (Fig. S1F). Taken together, our results  
101 indicate that TMEM-120 supports TAG accumulation and LD expansion.

102 Next, we sought to determine if mouse TMEM120A plays a conserved role in  
103 regulating fat storage, even though it was reported to be a mechanosensory channel  
104 (Beaulieu-Laroche et al., 2020). To this end, we expressed mouse TMEM120A in *daf-22;*  
105 *tmem-120* mutant worms. We found that TMEM120A could rescue the LD phenotype in a  
106 similar manner as *C. elegans* TMEM-120 (Fig. 1F). As a result, large LDs re-appeared in  
107 intestinal cells of *daf-22; tmem-120* mutant worms. Therefore, we conclude that TMEM-120  
108 and TMEM120A share a deeply conserved function of regulating cellular fat storage.

109

## 110 **TMEM-120 promotes the incorporation of fatty acids into TAG**

111           The cellular neutral lipid homeostasis is dependent on a balance between TAG  
112 synthesis and mobilization at LDs. The TAG synthesis in turn relies on the availability of  
113 dietary or de novo synthesized fatty acids. We sought to determine if the decrease in neutral  
114 lipid content was caused by a decrease in TAG accumulation or accelerated TAG  
115 mobilization by lipolysis in *tmem-120* mutant worms. To differentiate these possibilities, we  
116 used Stimulated Raman Scattering (SRS) to detect exogenously supplied deuterium-labeled  
117 fatty acids (Fu et al., 2014; Li et al., 2019). We tuned our system to detect C-D bond  
118 vibrations to avoid the interference from endogenous fatty acids. To measure TAG  
119 accumulation, we fed young adult wild type and mutant worms with deuterium-labeled  
120 monounsaturated oleic acid (OA-d<sub>34</sub>) and imaged live worms by SRS at regular intervals over  
121 a period of 30 hours (Fig. 2A). We detected progressive increase of SRS signals from LDs in  
122 both strains tested (Fig. 2C). However, the rate of increase in *tmem-120* worms was  
123 significantly slower than that in wild type worms (Fig. 2E). Similar observations were made  
124 when worms were fed deuterium-labeled saturated palmitic acid (PA-d<sub>31</sub>) (Fig. S2A, C and  
125 E). We conclude that loss of TMEM-120 function impairs the incorporation of exogenous  
126 fatty acids into TAG.

127           To measure lipolysis, we fed newly hatched larval stage L1 worms with deuterium-  
128 labeled monounsaturated oleic acid (OA-d<sub>34</sub>) until they reached the young adult stage. We  
129 then removed labeled fatty acids from the diet of these animals and imaged them by SRS at  
130 regular intervals (Fig. 2B). The dissipation of SRS signals over time reflected the rate of  
131 lipolysis, as the labeled fatty acids stored as TAG in LDs were metabolized. We found that  
132 the rate of decrease of SRS signals was not significantly different between wild type and  
133 *tmem-120* mutant worms (Fig. 2D and F). Similar observations were made when worms were  
134 fed with saturated palmitic acid (PA-d<sub>31</sub>) (Fig. S2B, D and F). We conclude that lipolysis is

135 not altered in *tmem-120* mutant worms. Taken together, our results indicate that the reduction  
136 of neutral lipid content in these animals was primarily due to the retardation of fatty acid  
137 incorporation into TAG.

138

### 139 **TMEM-120 is an ER resident protein**

140 Based on TOPCONS analysis (Tsirigos et al., 2015), the *C. elegans* TMEM-120 and  
141 its human orthologs share the same predicted membrane topology, with their N- and C-  
142 termini facing the cytoplasm (Fig. 3A). According to its cryo-EM structure, membrane  
143 embedded TMEM120A has 6 transmembrane helices and forms homodimers (Ke et al., 2021;  
144 Niu et al., 2021; Rong et al., 2021; Xue et al., 2021). Intriguing, a consensus has yet to  
145 emerge regarding the subcellular localization of TMEM120A. Mammalian TMEM120A was  
146 previously reported to reside at the nuclear envelope (Batrakou et al., 2015) or the  
147 endoplasmic reticulum (ER) (Cho et al., 2020). In contrast, the assignment of TMEM120A as  
148 a mechanosensory channel placed it at the plasma membrane (Beaulieu-Laroche et al., 2020).  
149 We sought to determine the localization of *C. elegans* TMEM-120 when it was expressed at  
150 the endogenous level in live animals. To this end, we used CRISPR mediated genome editing  
151 (Arribere et al., 2014) to insert the coding sequence of the green fluorescent protein (GFP)  
152 into the endogenous *tmem-120* locus (Fig. 3B). We generated two independent knockin  
153 alleles, *hj239* and *hj270* (Fig. 3B). In one strain, GFP was fused to the N-terminus of TMEM-  
154 120 via a flexible linker. In a second strain, GFP was expressed as part of the predicted C-  
155 terminal cytoplasmic tail, leaving the extreme C-terminus unaltered. This design was  
156 necessitated by the presence of a KxHxx motif at the C-terminus of TMEM-120, which could  
157 function similarly as the KxKxx motif for ER retention (Jackson et al., 1990; Ma and  
158 Goldberg, 2013). Both TMEM-120 fusion proteins were functional because their expression



159 did not significantly alter the lipid content of *daf-22* mutant worms, as observed when the  
160 function of TMEM-120 was lost (Fig. S3A-B). We used established markers of intestinal ER  
161 and LDs to ascertain the localization of TMEM-120 (Fig. 3C-D) and found that it co-  
162 localized extensively with the ER marker.

163         Next, we determined the localization of TMEM-120(G195E) by inserting the GFP  
164 coding sequence into the 5' end of *tmem-120(hj49)*. We found that GFP::TMEM-  
165 120(G195E) was expressed at a comparable level as the wild type protein and localized  
166 correctly to the ER (Fig. S3C). Therefore, we conclude that the G195E mutation most likely  
167 attenuates TMEM-120 function as predicted from the TMEM120A structure.

168         Finally, we experimentally verified the location of the N- and C-terminal tails of  
169 TMEM-120. To this end, we took advantage of the anti-GFP nanobody (vhhGFP4) directed  
170 protein degradation system (Wang et al., 2017). By expressing a GFP nanobody::ZIF-1  
171 fusion protein in the intestinal cytoplasm, GFP fusion proteins with the GFP moiety exposed  
172 in the cytoplasm are subject to degradation (Fig. 3E). However, if the GFP moiety is in the  
173 ER lumen, the fusion protein is protected. Indeed, we detected fluorescence signals from a  
174 luminal ER GFP marker (*hjSi528*), even when GFP nanobody::ZIF-1 was co-expressed in the  
175 same worm (Fig. 3F). In contrast, the two versions of GFP fusion protein with TMEM-120  
176 were subject to degradation, when GFP nanobody::ZIF-1 was co-expressed in the intestine  
177 (Fig. 3F). As a control, hypodermal GFP fusions with TMEM-120 remained detectable (Fig.  
178 3F), indicating that anti-GFP nanobody directed, post-translational degradation was tissue-  
179 restricted as designed. Taken together, our results firmly suggest that TMEM-120 is an ER  
180 resident protein, with its N- and C-termini facing the cytoplasm.

181

182

### 183 **TMEM-120 regulates LD expansion cell autonomously**

184 We generated an additional *tmem-120* deletion allele, *hj281*, using CRISPR mediated  
185 genome editing and Cre-LoxP mediated germline excision. Similar to the *hj50* allele, the  
186 *hj281* allele conferred *tmem-120* loss of function phenotypes and suppressed LD expansion in  
187 *daf-22* mutant worms (Fig. S3D-E). Re-expression of *tmem-120* in the intestine alone from a  
188 single-copy transgene (*hjSi557*) was sufficient to support LD expansion in *daf-22(-); tmem-*  
189 *120(hj281)* worms (Fig. S3D-E). Therefore, we conclude that TMEM-120 acts cell  
190 autonomously to promote LD expansion in *C. elegans*.

191

### 192 **TMEM120 promotes adipogenesis in mammalian cells**

193 The expression level of TMEM120A and TMEM120B is induced during the  
194 differentiation of 3T3-L1 pre-adipocytes into adipocytes (Batrakou et al., 2015). In addition,  
195 knockdown of TMEM120A and TMEM120B impedes the differentiation of 3T3-L1 pre-  
196 adipocytes (Batrakou et al., 2015). To extend these observations, we used an alternative  
197 model of adipogenesis: the murine OP9 pre-adipocytes (Wolins et al., 2006). In the presence  
198 of insulin and oleic acid, the OP9 pre-adipocytes could differentiate into adipocytes in 3 days,  
199 which was accompanied by the induction of adipocyte markers such as Glut4 and adiponectin  
200 (Fig. S4A-B). Over the same time course, the expression level of TMEM120A and  
201 TMEM120B was significantly increased (Fig. 4A-B). Next, we stably knocked down the  
202 expression of TMEM120A and/or TMEM120B in OP9 cells by CRISPRi (Gilbert et al.,  
203 2013) (Fig. S4C-D). Wild type and knockdown cells were induced to differentiate and mature  
204 adipocytes were recognized by the appearance of a single, dominant LD (>15 $\mu$ m), as  
205 visualized by Oil Red O staining (Fig. 4C-D). Consistent with previous observations in 3T3-  
206 L1 cells, knockdown of TMEM120A and/or TMEM120B significantly reduced the ability of

207 OP9 cells to differentiate into adipocytes (Fig. 4C-D). Our results suggest that the two  
208 mammalian TMEM120 paralogs are required for adipogenesis in vitro.

209

### 210 **TMEM120 promotes LD expansion in mammalian cells**

211 Next, we tested if TMEM120A was sufficient to promote LD expansion in  
212 mammalian COS7 cells. To this end, we generated COS7 cells that stably over-expressed  
213 TMEM120A using the Sleeping Beauty Transposon system (Kowarz et al., 2015). When  
214 oleic acid was added to induce LD expansion, we observed significantly larger LDs in cells  
215 that over-expressed TMEM120A in comparison to parental cells (Fig. 4E-F). Therefore,  
216 TMEM120A is sufficient to promote LD expansion, plausibly by elevating the amount of  
217 fatty acids that are available for the synthesis of TAG, which is stored in LDs. It should be  
218 noted that excess fatty acids that cannot be incorporated into TAG, are toxic to cells. As a  
219 result, cell death ensues (Listenberger et al., 2003). Accordingly, COS7 cells that over-  
220 expressed TMEM120A are more sensitive than parental cells to inhibitors of diacylglycerol  
221 acyltransferase 1 (DGAT1) in the presence of exogenous fatty acids (Fig. 4G-J, S4E-F).  
222 Almost all cells that over-expressed TMEM120A died when oleic or palmitic acid was  
223 applied simultaneously with the DGAT1 inhibitor A922500. Interestingly, the dose-sensitive  
224 response to DGAT1 inhibitors was not observed for a diacylglycerol acyltransferase 2  
225 (DGAT2) inhibitor (Fig. S4G). Based on the current model of LD biogenesis and expansion  
226 (Cao and Mak, 2020; Olzmann and Carvalho, 2019), DGAT1 in the ER acts early to  
227 synthesize TAG that supports the emergence of LDs from the ER while LD-localized  
228 DGAT2 contributes more significantly to the expansion of mature LDs. Our results on the  
229 differential sensitivity of TMEM120A over-expressing cells to DGAT1 inhibitors are

230 consistent with the notion that TMEM120A acts in the ER to promote the incorporation of  
231 fatty acids into TAG, upstream of DGAT1.

232

### 233 **Concluding remarks**

234 In this paper, we combined genetic, imaging and pharmacological approaches to  
235 demonstrate an evolutionarily conserved function of TMEM-120/TMEM120A in promoting  
236 TAG synthesis and LD expansion. Our examination of TMEM-120 at the endogenous level  
237 in live worms strongly suggests the ER as its primary site of action. This is consistent with  
238 the notion that the ensemble of TAG synthesis proteins can all be found in the ER, which  
239 conceivably enables the transfer of biosynthetic intermediates within the membrane.

240 Although we do not yet know if TMEM-120/TMEM120A acts specifically with one or more  
241 enzymes in the TAG synthesis pathway, the ability of purified TMEM120A to bind CoASH  
242 is intriguing (Niu et al., 2021; Rong et al., 2021; Xue et al., 2021). This is because fatty acids  
243 are converted to fatty acyl-CoA by acyl-CoA synthetases, prior to their addition to the  
244 glycerol backbone by a series of acyltransferases (Coleman and Lee, 2004; Yen et al., 2008).

245 We note that TMEM-120 mutant worms remain capable of TAG synthesis, albeit at a  
246 reduced level (Fig. 1E). It is plausible that TMEM-120/TMEM120A can trap CoASH or  
247 acyl-CoA in the ER to enhance the efficiency of TAG synthesis. Such hypothesis can be  
248 tested with purified proteins and substrates in vitro. In conclusion, our functional studies in *C.*  
249 *elegans* and mammalian cells support the conclusion from structural studies that TMEM120A  
250 and its orthologs are unlikely to be mechanosensory channels.

251 **Materials and Methods**

252 **Strains and transgenes**

253 The wide type *C. elegans* strain was Bristol N2. All experimental animals were maintained at  
254 20°C. The following strains and alleles were used: LG I, EG6701 (*ttTi4348*); LG II, *daf-22*  
255 (*ok693*); LG III, *tmem-120(h49)*, *tmem-120(hj50)*; LG IV, EG6703 (*cxTi10816*).

256 The following transgenes or CRISPR-generated alleles were used:

257 *hjSi158* [*vha-6p::sel-1(a.a.1-79)::mCherry::HDEL::let-858 3'UTR*] I

258 *hjSi524* [*vha-6p::vhhgfp4::zif-1::let-858 3'UTR*] I

259 *hjSi528* [*vha-6p::sel-1(a.a.1-79)::GFP::HDEL::tbb-2 3'UTR*] IV

260 *hjSi557* [*vha-6p::gfp::3xFLAG::tmem-120(codon modified) cDNA::dhs-28 3'-UTR*] IV

261 *dhs-3 (hj200)* [*dhs-3::mRuby*] I

262 *tmem-120 (hj239)* [*tmem-120(a.a.1-368)::gfp::3xFLAG::tmem-120(a.a.369 to stop)*] III

263 *tmem-120 (hj266)* [*tmem-120(a.a.1-368)(loxP in introns 3 and 4)::gfp::3xFLAG::tmem-*  
264 *120(a.a.369 to stop)*] III

265 *tmem-120 (hj270)* [*GFP::3xFLAG::tmem-120*] III

266 *tmem-120 (hj297)* [*GFP::3xFLAG::TMEM-120(G195E)*] III

267 The *tmem-120(hj281)* allele was generated by Cre-loxP mediated germline excision of *tmem-*  
268 *120(hj266)*.

269 Extrachromosomal array strains:

270 *hjEx29*[*vha-6p::tmem-120 cDNA::sl2::gfp::let-858 3' UTR*]

271 *hjEx30*[*vha-6p::mouse tmem120a cDNA::sl2::gfp::let-858 3'UTR*]

272 All strains were outcrossed with wild type N2 at least twice before further characterization.

273

274

275 **Genetic screen**

276 The *tmem-120* alleles were isolated in a genetic screen for suppressors of the expanded LD  
277 phenotype of *daf-22(ok693)* mutants. Complementation tests indicated that *hj49* and *hj50*  
278 belonged to the same complementation group. Using a SNP-based mapping strategy with the  
279 Hawaiian *C. elegans* isolate CB4856 (Davis et al., 2005), we mapped *hj50* to LGIII. Mutant  
280 worms were then subjected to whole genome sequencing (Illumina). The molecular lesions of  
281 *hj49* and *hj50* in M01G5.3 were confirmed by Sanger sequencing. The *daf-22(ok693); tmem-*  
282 *120(hj50)* mutant could be rescued by a *vha-6p::tmem-120::sl2::gfp* transgene (Fig. 1F).

283

284 **Fluorescence Imaging of *C. elegans* and mammalian cells**

285 Fluorescence imaging of live worms and mammalian cells was performed as described (Cao  
286 et al., 2019). In brief, fluorescence images of worms at indicated stages were acquired on a  
287 spinning disk confocal microscope (AxioObserver Z1, Carl Zeiss) equipped with a piezo Z  
288 stage using a 63x, NA 1.4 (for visualizing TMEM-120 localization) or 100x, NA 1.46 (for  
289 quantification of LD diameter) oil Alpha-Plan-Apochromat objective on a Neo sCMOS  
290 camera (Andor) controlled by the iQ3 software (Andor). For GFP, a 488nm laser was used  
291 for excitation and signals were collected with a 500-550nm emission filter. For mRuby or  
292 mCherry, a 561nm laser was used for excitation and signals were collected with a 580.5-  
293 653.5nm emission filter. For autofluorescence from lysosome-related organelles, a 488nm  
294 laser was used for excitation and signals were collected with a 580.5-653.5nm emission filter.  
295 For BFP, a 405 nm laser was used for excitation, and signals were collected with a 437nm  
296 emission filter. For FAS LD dye, a 405nm laser was used for excitation and signals were  
297 collected with a 617nm emission filter. Optical sections, as specified, were taken at 0.5 $\mu$ m

298 intervals and z stacks of 8 $\mu$ m-10 $\mu$ m were exported from iQ3 to Imaris 8 (Bitplane) for  
299 processing.

300

### 301 **Live imaging by Stimulated Raman Scattering**

302 Stimulated Raman Scattering (SRS) for measuring endogenous neutral lipid in live worms  
303 was carried out as described (Li et al., 2015). Live animals at specific stages were mounted  
304 on 8% agarose pad in 1xPBS buffer with 0.2mM levamisole. For visualizing LDs, the focal  
305 plane for the center of the first and second intestinal segments in young adult animals was  
306 determined with a 40x water immersion objective (UAPO40XW3/340, 1.15 NA, Olympus).  
307 To measure neutral lipid content level in whole worms, the focal plane with maximal SRS  
308 intensity was determined with a 20x air objective (Plan-Apochromat, 0.8 NA, Zeiss). The C-  
309 H bond was detected at 2863.5  $\text{cm}^{-1}$ . The quantification of SRS signal was done following a  
310 published protocol (Ramachandran et al., 2015). SRS of live worms for measuring fatty acid  
311 absorption and lipolysis were carried out as described with a 40x water immersion objective  
312 (UAPO40XW3/340, 1.15 NA, Olympus) (Li et al., 2019). Saturated bacterial cultures of  
313 OP50 were mixed with 4mM deuterium labeled PA-d<sub>31</sub> or OA-d<sub>34</sub> (Sigma) and then seeded  
314 onto NGM plates. To measure fatty acid uptake, populations of young adult worms (before  
315 egg-laying started), raised in the absence of deuterium labeled fatty acid were transferred to  
316 plates with PA-d<sub>31</sub> or OA-d<sub>34</sub>. To measure lipolysis, populations of L1 larvae were raised on  
317 plates with PA-d<sub>31</sub> or OA-d<sub>34</sub>, and transferred to OP50 seeded plates without deuterium  
318 labeled fatty acid when they were young adults. Animals were imaged by SRS at 5 to 6-hour  
319 intervals for 28 to 30 hours. The C-D bond vibration was detected at 2116.8  $\text{cm}^{-1}$ . Images  
320 were imported into ImageJ and further processed for quantification in MATLAB\_R2015a.

321

### 322 **Real-time PCR for *C. elegans* samples**

323 For each experimental sample, around 400 worms were synchronized at the L1 larval stage.  
324 Worms were harvested at the L4 stage (43 hours after L1 for WT, and 46 hours after L1 for  
325 *tmem-120(hj50)*), and total RNA extracted with a Direct-zol™ RNA MiniPrep kit (Zymo).  
326 200ng of total RNA was reverse transcribed with a Transcriptor cDNA synthesis kit (Roche).  
327 The real time PCR was carried out on a Roche LightCycler system with SYBR Green Master  
328 Mix (Roche). For each strain, technical triplicates were performed for each biological  
329 sample. The Delta-delta CT method was used for analyzing the raw CT values.

330 The following primers were used for RT-qPCR:

331 For *tmem-120*:

332 Forward: 5'-TGAGACAAGCCCAACAATCA-3'

333 Reverse: 5'-TGGAGCCCAAATCAAATTC-3'

334 For internal standard *rpl-32*:

335 Forward: 5'-AGGGAATTGATAACCGTGTCCGCA-3'

336 Reverse: 5'-TGTAGGACTGCATGAGGAGCATGT-3'

337

### 338 **Real-time PCR of mammalian samples**

339 Total RNA was extracted from mammalian cells using Direct-zol™ RNA MiniPrep kit  
340 (Zymo) following the manufacturer's protocol. 500ng of total RNA was reverse transcribed  
341 using First Strand cDNA Synthesis Kit (Sigma Aldrich) following the manufacturer's  
342 protocol. The real time PCR was performed on a LightCycler480 system (Roche) using  
343 SYBR Green Master Mix (Roche) following the manufacturer's protocol. Data was obtained  
344 with 3 biological samples of each cell line, tested in technical triplicates. The Delta-delta CT  
345 method was used for analyzing the raw CT values.



346 The following primers were used:

347 For TMEM120A:

348 Forward: 5'-AGGGCTTTCAGTCTTGGATG-3'

349 Reverse: 5'-AAATTGCCGAGGAAGAGGAG-3'

350 For TMEM120B:

351 Forward: 5'-TCAGAGCTGCGTTCAGTTTC-3'

352 Reverse: 5'-ACAGAAGAGGAAAGGCAGGAG-3'

353 For Glut4:

354 Forward: 5'-GTA ACTTCATTGTCGGCATGG-3'

355 Reverse: 5'-CTCTGGTTTCAGGCACTTTTAG-3'

356 For Adiponectin:

357 Forward: 5'-CCTGGCCACTTTCTCCTC-3'

358 Reverse: 5'-GTGGAGGGACCAAAGCAG-3'

359 For 36B4 (internal control) (Zhang et al., 2016):

360 Forward: 5'-CTGAGTGATGTGCAGCTGAT-3'

361 Reverse: 5'-AGAAGGGGGAGATGTTTCAG-3'

362

### 363 **Pharyngeal pumping rate**

364 Videos for pharyngeal pumping rate measurement were obtained on an OLYMPUS SZX16  
365 stereo microscope. One day before the imaging, L4 stage worms were transferred to a newly  
366 seeded NGM plate. The plates were left beside the microscope for acclimatization. For each  
367 experimental group, up to 10 worms were prepared. A 2-minute video focusing on the  
368 pharynx of each worm was captured. Each video was trimmed to a 60 seconds clip and then  
369 played under 0.3X speed for counting the number of pharyngeal contractions visually.

370

## 371 **Lipid analysis**

372 Lipid extraction was conducted using methyl-tert-butyl ether(MTBE) as described (Matyash  
373 et al., 2008; Witting et al., 2014), with modifications. For each experimental sample, around  
374 2,000 worms were synchronized at L1 larvae stage. Worms were harvested at the L4 stage  
375 (43 hours after L1 for WT, and 46 hours after L1 for *tmem-120(hj50)*), washed with detergent  
376 free PBS for at least three times and transferred into organic solvent resistant Eppendorf  
377 tubes. 250µl methanol (precooled to -20°C) (RDH, for HPLC) was added and samples were  
378 frozen in liquid nitrogen and stored at -80°C. For extraction, samples were thawed on ice, and  
379 875µl MTBE (VWR, for HPLC) was added. Worms were lysed with ice cold ultrasonic bath  
380 with an interval of 2 mins on and 30 seconds off. Phase separation was induced by the  
381 addition of 210µl water with further sonication for 15 mins. After centrifugation at 16,100xG  
382 at 4°C for 15 mins, the upper organic phase was collected into a glass vial. 325µl MTBE was  
383 added to the lower phase and centrifuged at 17,000xG at 4°C for 15 mins for re-extraction of  
384 lipids. Upper organic phase was collected after centrifugation and combined with those  
385 previously collected. Extracts were dried under a stream of nitrogen at room temperature, re-  
386 dissolved in 200µl acetonitrile (RCI Labscan, for HPLC)/ isopropanol (RNH)/ water(65/30/5,  
387 v/v/v) and stored at -80 °C.

388 Lipid analysis was performed as previously described (Zeng et al., 2020). A 100µl aliquot  
389 was analyzed using the Bruker Elute UPLC system with 2 technical injections per sample.  
390 The mass spectrometry data was analyzed with MetaboScape version 5.0, annotated with  
391 spectral libraries MSDIAL- Tandem Mass Spectral Atlas-VS68-pos and MSDIAL- Tandem  
392 Mass 736 Spectral Atlas-VS68-neg. The intensity was normalized with probabilistic quotient  
393 normalization method (Dieterle et al., 2006). Signals from all TAG species were summed.

394

395 **Cell culture**

396 OP9 mouse stromal cells (ATCC-CRL-2749) were maintained in  $\alpha$ -MEM (Life  
397 Technologies) with 20% FBS (Life Technologies) and 1% antibiotic-antimycotic (Life  
398 Technologies). COS7 Cells (ATCC-CRL-1651) were maintained in DMEM (Life  
399 Technologies) with 10% FBS (Life Technologies) and 1% antibiotic-antimycotic (Life  
400 Technologies). All the cell lines were incubated in 37°C humidified incubator with 5% CO<sub>2</sub>.

401

402 **Generation of TMEM120A overexpressing COS7 cells**

403 The Sleeping beauty transposon system was used to generate COS7 cells that overexpressed  
404 human TMEM120A. Cells were co-transfected with sleeping beauty transposon plasmid  
405 pSBi-Hyg-BFP (hTMEM120A cDNA) and sleeping beauty transposase plasmid pCMV  
406 (CAT) T7-SB100 with Lipofectamine2000 (Life Technologies). Three days after  
407 transfection, cells were maintained in selection medium (400 $\mu$ g/mL hygromycin in DMEM  
408 growth medium) for at least seven days. Cells that survived drug selection were sorted using  
409 Aria III system (Becton Dickinson) and sub-divided into 'Low', 'Medium', and 'High'  
410 populations based on BFP fluorescence intensity (a surrogate of TMEM120A expression).  
411 The 'High' cell population was used in subsequent experiments.

412

413 **Generation of TMEM120A and TMEM120B knockdown OP9 cells**

414 OP9 cells were co-transfected with the sleeping beauty transposase plasmid pCMV (CAT)  
415 T7-SB100 and the transposon plasmid (Krab::dCas9::BFP::TMEM120A sgRNA or  
416 TMEM120B sgRNA). The sgRNA sequences were selected from a published database  
417 (Horlbeck et al., 2016). The transfected cells were maintained in selection medium  
418 (400 $\mu$ g/mL hygromycin in  $\alpha$ -MEM growth medium) for at least seven days. Cells that

419 survived drug selection were sorted into ‘Low’, ‘Medium’, and ‘High’ populations based on  
420 the BFP fluorescence intensity (a surrogate of dCas9 and sgRNA expression). The ‘Medium’  
421 cell populations were used for subsequent experiments.

422 For the TMEM120A+TMEM120B double knockdown cells, the sleeping beauty transposase  
423 plasmid and the transposon plasmid (mRuby::TMEM120B sgRNA) were transfected into  
424 TMEM120A knockdown cells. Drug selection and cell sorting were performed as described  
425 above except that puromycin was used instead of hygromycin. The ‘High’ cell population  
426 was used for subsequent experiments. The knockdown efficiency of all stable cell lines was  
427 determined by real time PCR.

428

#### 429 **Fatty acid supplementation**

430 Fatty acids supplementation was performed according to a published method (Cao et al.,  
431 2019; Peng et al., 2011). In brief, the cell culture medium was pre-heated to 60°C for 5 mins  
432 prior to the addition of fatty acids (400µM oleic acid or palmitic acid). The medium was then  
433 equilibrated to 37°C before use. To induce LD expansion, cells were incubated with 400µM  
434 FAs for 20 hours. To visualize LDs, the cells were stained with 10µM FAS (Wang et al.,  
435 2016) for 15 mins prior to imaging.

436

#### 437 **DGAT inhibitor and fatty acids treatment**

438 The cell culture medium was pre-heated to 60°C for 5 mins prior to the addition of fatty acids  
439 (400µM oleic acid or 400µM palmitic acid or ethanol control), without (DMSO control) or  
440 with DGAT inhibitors as specified (A922500, PF04620110 or PF 06424439 (R&D system)).  
441 The medium was equilibrated to 37°C before use. The cells were treated with 20 hours (oleic

442 acid) or 60 hours (palmitic acid) before they were stained with crystal violet. Quantification  
443 of crystal violet was performed according to a published protocol (Feoktistova et al., 2016).

444 **Author Contributions**

445 Y.L. was responsible for Figs. 1, 2, 3, S1 (except S1F), S2 and S3. S.H. was responsible for  
446 Figs. 4 and S4. X.L. and J.Q. were responsible for developing the SRS system and Figs. 1A-  
447 B, 2 and S2. X.Y. was responsible for Fig. S1F and the generation of *tmem-120(hj266)*,  
448 *tmem-120(hj281)* and *hjSi557*. N.X. conducted genetic screen, genetic mapping and  
449 molecular cloning of *C. elegans* mutants. H.Y.M. supervised the project and wrote the paper.

450

451 **Acknowledgements**

452 We thank Yifei Qiu for preliminary data, Zhenfeng Liu for discussion, Pui Shuen Wong at  
453 the HKUST Bioscience Central Research Facility for lipidomic analysis, the Molecular  
454 Biology core at the Stowers Institute for Medical Research for whole-genome sequencing.  
455 Some strains were provided by the CGC, which is funded by NIH Office of Research  
456 Infrastructure Programs (P40 OD010440). This work was supported by RGC GRF 662013 to  
457 HYM.

458

459 **Competing interests**

460 The authors declare no competing interest.

## 461 References

- 462 Arribere JA, Bell RT, Fu BXH, Artiles KL, Hartman PS, Fire AZ. 2014. Efficient marker-  
463 free recovery of custom genetic modifications with CRISPR/Cas9 in *Caenorhabditis*  
464 *elegans*. *Genetics* **198**:837–846. doi:10.1534/genetics.114.169730
- 465 Batrakou DG, de Las Heras JI, Czapiewski R, Mouras R, Schirmer EC. 2015. TMEM120A  
466 and B: Nuclear Envelope Transmembrane Proteins Important for Adipocyte  
467 Differentiation. *PLoS One* **10**:e0127712. doi:10.1371/journal.pone.0127712
- 468 Beaulieu-Laroche L, Christin M, Donoghue A, Agosti F, Yousefpour N, Petitjean H,  
469 Davidova A, Stanton C, Khan U, Dietz C, Faure E, Fatima T, MacPherson A,  
470 Mouchbahani-Constance S, Bisson DG, Haglund L, Ouellet JA, Stone LS, Samson J,  
471 Smith M-J, Ask K, Ribeiro-da-Silva A, Blunck R, Poole K, Bourinet E, Sharif-Naeini  
472 R. 2020. TACAN Is an Ion Channel Involved in Sensing Mechanical Pain. *Cell*  
473 **180**:956–967.e17. doi:10.1016/j.cell.2020.01.033
- 474 Cao Z, Hao Y, Fung CW, Lee YY, Wang P, Li X, Xie K, Lam WJ, Qiu Y, Tang BZ, Shui G,  
475 Liu P, Qu J, Kang B-H, Mak HY. 2019. Dietary fatty acids promote lipid droplet  
476 diversity through seipin enrichment in an ER subdomain. *Nat Commun* **10**:2902.  
477 doi:10.1038/s41467-019-10835-4
- 478 Cao Z, Mak HY. 2020. Married at Birth: Regulation of Cellular Fat Metabolism by ER–Lipid  
479 Droplet Crosstalk. *Contact*. doi:10.1177/2515256420934671
- 480 Cho KF, Branon TC, Udeshi ND, Myers SA, Carr SA, Ting AY. 2020. Proximity labeling in  
481 mammalian cells with TurboID and split-TurboID. *Nat Protoc* **15**:3971–3999.  
482 doi:10.1038/s41596-020-0399-0
- 483 Coleman RA, Lee DP. 2004. Enzymes of triacylglycerol synthesis and their regulation. *Prog*  
484 *Lipid Res* **43**:134–176.
- 485 Czapiewski R, Batrakou DG, de las Heras JI, Carter RN, Sivakumar A, Sliwinska M, Dixon  
486 CR, Webb S, Lattanzi G, Morton NM, Schirmer EC. 2021. Genomic loci  
487 mispositioning in *Tmem120a* knockout mice yields latent lipodystrophy.  
488 *bioRxiv* 2021.04.12.439495. doi:10.1101/2021.04.12.439495
- 489 Davis MW, Hammarlund M, Harrach T, Hullett P, Olsen S, Jorgensen EM. 2005. Rapid  
490 single nucleotide polymorphism mapping in *C. elegans*. *BMC Genomics* **6**:118.  
491 doi:10.1186/1471-2164-6-118
- 492 Dieterle F, Ross A, Schlotterbeck G, Senn H. 2006. Probabilistic quotient normalization as  
493 robust method to account for dilution of complex biological mixtures. Application in  
494 1H NMR metabolomics. *Anal Chem* **78**:4281–4290. doi:10.1021/ac051632c
- 495 Feoktistova M, Geserick P, Leverkus M. 2016. Crystal Violet Assay for Determining  
496 Viability of Cultured Cells. *Cold Spring Harb Protoc* **2016**:pdb.prot087379.  
497 doi:10.1101/pdb.prot087379
- 498 Fu D, Yu Y, Folick A, Currie E, Farese RV, Tsai T-H, Xie XS, Wang MC. 2014. In vivo  
499 metabolic fingerprinting of neutral lipids with hyperspectral stimulated Raman  
500 scattering microscopy. *J Am Chem Soc* **136**:8820–8828. doi:10.1021/ja504199s
- 501 Gilbert LA, Larson MH, Morsut L, Liu Z, Brar GA, Torres SE, Stern-Ginossar N, Brandman  
502 O, Whitehead EH, Doudna JA, Lim WA, Weissman JS, Qi LS. 2013. CRISPR-  
503 mediated modular RNA-guided regulation of transcription in eukaryotes. *Cell*  
504 **154**:442–451. doi:10.1016/j.cell.2013.06.044
- 505 Henne WM, Reese ML, Goodman JM. 2018. The assembly of lipid droplets and their roles in  
506 challenged cells. *EMBO J* **37**:e98947. doi:10.15252/embj.201898947
- 507 Horlbeck MA, Gilbert LA, Villalta JE, Adamson B, Pak RA, Chen Y, Fields AP, Park CY,  
508 Corn JE, Kampmann M, Weissman JS. 2016. Compact and highly active next-

- 509 generation libraries for CRISPR-mediated gene repression and activation. *eLife* **5**.  
510 doi:10.7554/eLife.19760
- 511 Jackson MR, Nilsson T, Peterson PA. 1990. Identification of a consensus motif for retention  
512 of transmembrane proteins in the endoplasmic reticulum. *EMBO J* **9**:3153–3162.
- 513 Ke M, Yu Y, Zhao C, Lai S, Su Q, Yuan W, Yang L, Deng D, Wu K, Zeng W, Geng J, Wu J,  
514 Yan Z. 2021. Cryo-EM structures of human TMEM120A and TMEM120B. *bioRxiv*  
515 2021.06.27.450060. doi:10.1101/2021.06.27.450060
- 516 Kowarz E, Löscher D, Marschalek R. 2015. Optimized Sleeping Beauty transposons rapidly  
517 generate stable transgenic cell lines. *Biotechnol J* **10**:647–653.  
518 doi:10.1002/biot.201400821
- 519 Li X, Lam WJ, Cao Z, Hao Y, Sun Q, He S, Mak HY, Qu JY. 2015. Integrated femtosecond  
520 stimulated Raman scattering and two-photon fluorescence imaging of subcellular lipid  
521 and vesicular structures. *J Biomed Opt* **20**:110501. doi:10.1117/1.JBO.20.11.110501
- 522 Li X, Li Y, Jiang M, Wu W, He S, Chen C, Qin Z, Tang BZ, Mak HY, Qu JY. 2019.  
523 Quantitative Imaging of Lipid Synthesis and Lipolysis Dynamics in *Caenorhabditis*  
524 *elegans* by Stimulated Raman Scattering Microscopy. *Anal Chem* **91**:2279–2287.  
525 doi:10.1021/acs.analchem.8b04875
- 526 Listenberger LL, Han X, Lewis SE, Cases S, Farese RV, Ory DS, Schaffer JE. 2003.  
527 Triglyceride accumulation protects against fatty acid-induced lipotoxicity. *Proc Natl*  
528 *Acad Sci U S A* **100**:3077–3082. doi:10.1073/pnas.0630588100
- 529 Ma W, Goldberg J. 2013. Rules for the recognition of dilysine retrieval motifs by coatomer.  
530 *EMBO J* **32**:926–937. doi:10.1038/emboj.2013.41
- 531 Matyash V, Liebisch G, Kurzchalia TV, Shevchenko A, Schwudke D. 2008. Lipid extraction  
532 by methyl-tert-butyl ether for high-throughput lipidomics. *J Lipid Res* **49**:1137–1146.  
533 doi:10.1194/jlr.D700041-JLR200
- 534 Niu Y, Tao X, Vaisey G, Olinares PDB, Alwaseem H, Chait BT, MacKinnon R. 2021.  
535 Analysis of the Mechanosensor Channel Functionality of TACAN. *bioRxiv*  
536 2021.06.11.448078. doi:10.1101/2021.06.11.448078
- 537 Olzmann JA, Carvalho P. 2019. Dynamics and functions of lipid droplets. *Nat Rev Mol Cell*  
538 *Biol* **20**:137–155. doi:10.1038/s41580-018-0085-z
- 539 Peng G, Li L, Liu Y, Pu J, Zhang S, Yu J, Zhao J, Liu P. 2011. Oleate blocks palmitate-  
540 induced abnormal lipid distribution, endoplasmic reticulum expansion and stress, and  
541 insulin resistance in skeletal muscle. *Endocrinology* **152**:2206–2218.  
542 doi:10.1210/en.2010-1369
- 543 Ramachandran PV, Mutlu AS, Wang MC. 2015. Label-free biomedical imaging of lipids by  
544 stimulated Raman scattering microscopy. *Curr Protoc Mol Biol* **109**:30.3.1–17.  
545 doi:10.1002/0471142727.mb3003s109
- 546 Rong Y, Jiang J, Gao Y, Guo J, Song D, Liu W, Zhao Y, Xiao B, Liu Z. 2021. TMEM120A  
547 contains a specific coenzyme A-binding site and might not mediate poking- or stretch-  
548 induced channel activities in cells. *bioRxiv* 2021.06.17.448797.  
549 doi:10.1101/2021.06.17.448797
- 550 Schirmer EC, Florens L, Guan T, Yates JR, Gerace L. 2003. Nuclear membrane proteins with  
551 potential disease links found by subtractive proteomics. *Science* **301**:1380–1382.  
552 doi:10.1126/science.1088176
- 553 Schuldiner M, Bohnert M. 2017. A different kind of love - lipid droplet contact sites. *Biochim*  
554 *Biophys Acta* **1862**:1188–1196. doi:10.1016/j.bbailip.2017.06.005
- 555 Thiam AR, Ikonen E. 2021. Lipid Droplet Nucleation. *Trends Cell Biol* **31**:108–118.  
556 doi:10.1016/j.tcb.2020.11.006



- 557 Tsirigos KD, Peters C, Shu N, Käll L, Elofsson A. 2015. The TOPCONS web server for  
558 consensus prediction of membrane protein topology and signal peptides. *Nucleic*  
559 *Acids Res* **43**:W401-407. doi:10.1093/nar/gkv485
- 560 Walther TC, Chung J, Farese RV. 2017. Lipid Droplet Biogenesis. *Annu Rev Cell Dev Biol*  
561 **33**:491–510. doi:10.1146/annurev-cellbio-100616-060608
- 562 Wang MC, Min W, Freudiger CW, Ruvkun G, Xie XS. 2011. RNAi screening for fat  
563 regulatory genes with SRS microscopy. *Nat Methods* **8**:135–138.  
564 doi:10.1038/nmeth.1556
- 565 Wang S, Tang NH, Lara-Gonzalez P, Zhao Z, Cheerambathur DK, Prevo B, Chisholm AD,  
566 Desai A, Oegema K. 2017. A toolkit for GFP-mediated tissue-specific protein  
567 degradation in *C. elegans*. *Dev Camb Engl* **144**:2694–2701. doi:10.1242/dev.150094
- 568 Wang Z, Gui C, Zhao E, Wang J, Li X, Qin A, Zhao Z, Yu Z, Tang BZ. 2016. Specific  
569 Fluorescence Probes for Lipid Droplets Based on Simple AIEgens. *ACS Appl Mater*  
570 *Interfaces* **8**:10193–10200. doi:10.1021/acsami.6b01282
- 571 Witting M, Maier TV, Garvis S, Schmitt-Kopplin P. 2014. Optimizing a ultrahigh pressure  
572 liquid chromatography-time of flight-mass spectrometry approach using a novel sub-  
573 2µm core-shell particle for in depth lipidomic profiling of *Caenorhabditis elegans*. *J*  
574 *Chromatogr A* **1359**:91–99. doi:10.1016/j.chroma.2014.07.021
- 575 Wolins NE, Quaynor BK, Skinner JR, Tzekov A, Park C, Choi K, Bickel PE. 2006. OP9  
576 mouse stromal cells rapidly differentiate into adipocytes: characterization of a useful  
577 new model of adipogenesis. *J Lipid Res* **47**:450–460. doi:10.1194/jlr.D500037-  
578 JLR200
- 579 Xu N, Zhang SO, Cole RA, McKinney SA, Guo F, Haas JT, Bobba S, Farese RV Jr, Mak  
580 HY. 2012. The FATP1-DGAT2 complex facilitates lipid droplet expansion at the ER-  
581 lipid droplet interface. *J Cell Biol* **198**:895–911. doi:10.1083/jcb.201201139
- 582 Xue J, Han Y, Baniyadi H, Zeng W, Pei J, Grishin N, Wang J, Tu BP, Jiang Y. 2021.  
583 TMEM120 is a coenzyme A-binding membrane protein with structural similarities to  
584 ELOVL fatty acid elongase. *bioRxiv* 2021.06.13.448233.  
585 doi:10.1101/2021.06.13.448233
- 586 Yen C-LE, Stone SJ, Koliwad S, Harris C, Farese RV Jr. 2008. Thematic review series:  
587 glycerolipids. DGAT enzymes and triacylglycerol biosynthesis. *J Lipid Res* **49**:2283–  
588 2301. doi:10.1194/jlr.R800018-JLR200
- 589 Zeng L, Li X, Preusch CB, He GJ, Xu N, Cheung TH, Qu J, Mak HY. 2020. Nuclear receptor  
590 NHR-49 promotes peroxisome proliferation to compensate for aldehyde  
591 dehydrogenase deficiency in *C. elegans*. *bioRxiv* 2020.12.04.411637.  
592 doi:10.1101/2020.12.04.411637
- 593 Zhang SO, Box AC, Xu N, Le Men J, Yu J, Guo F, Trimble R, Mak HY. 2010. Genetic and  
594 dietary regulation of lipid droplet expansion in *Caenorhabditis elegans*. *Proc Natl*  
595 *Acad Sci U S A* **107**:4640–4645. doi:10.1073/pnas.0912308107
- 596 Zhang W-X, Fan J, Ma J, Rao Y-S, Zhang L, Yan Y-E. 2016. Selection of Suitable Reference  
597 Genes for Quantitative Real-Time PCR Normalization in Three Types of Rat Adipose  
598 Tissue. *Int J Mol Sci* **17**:E968. doi:10.3390/ijms17060968  
599

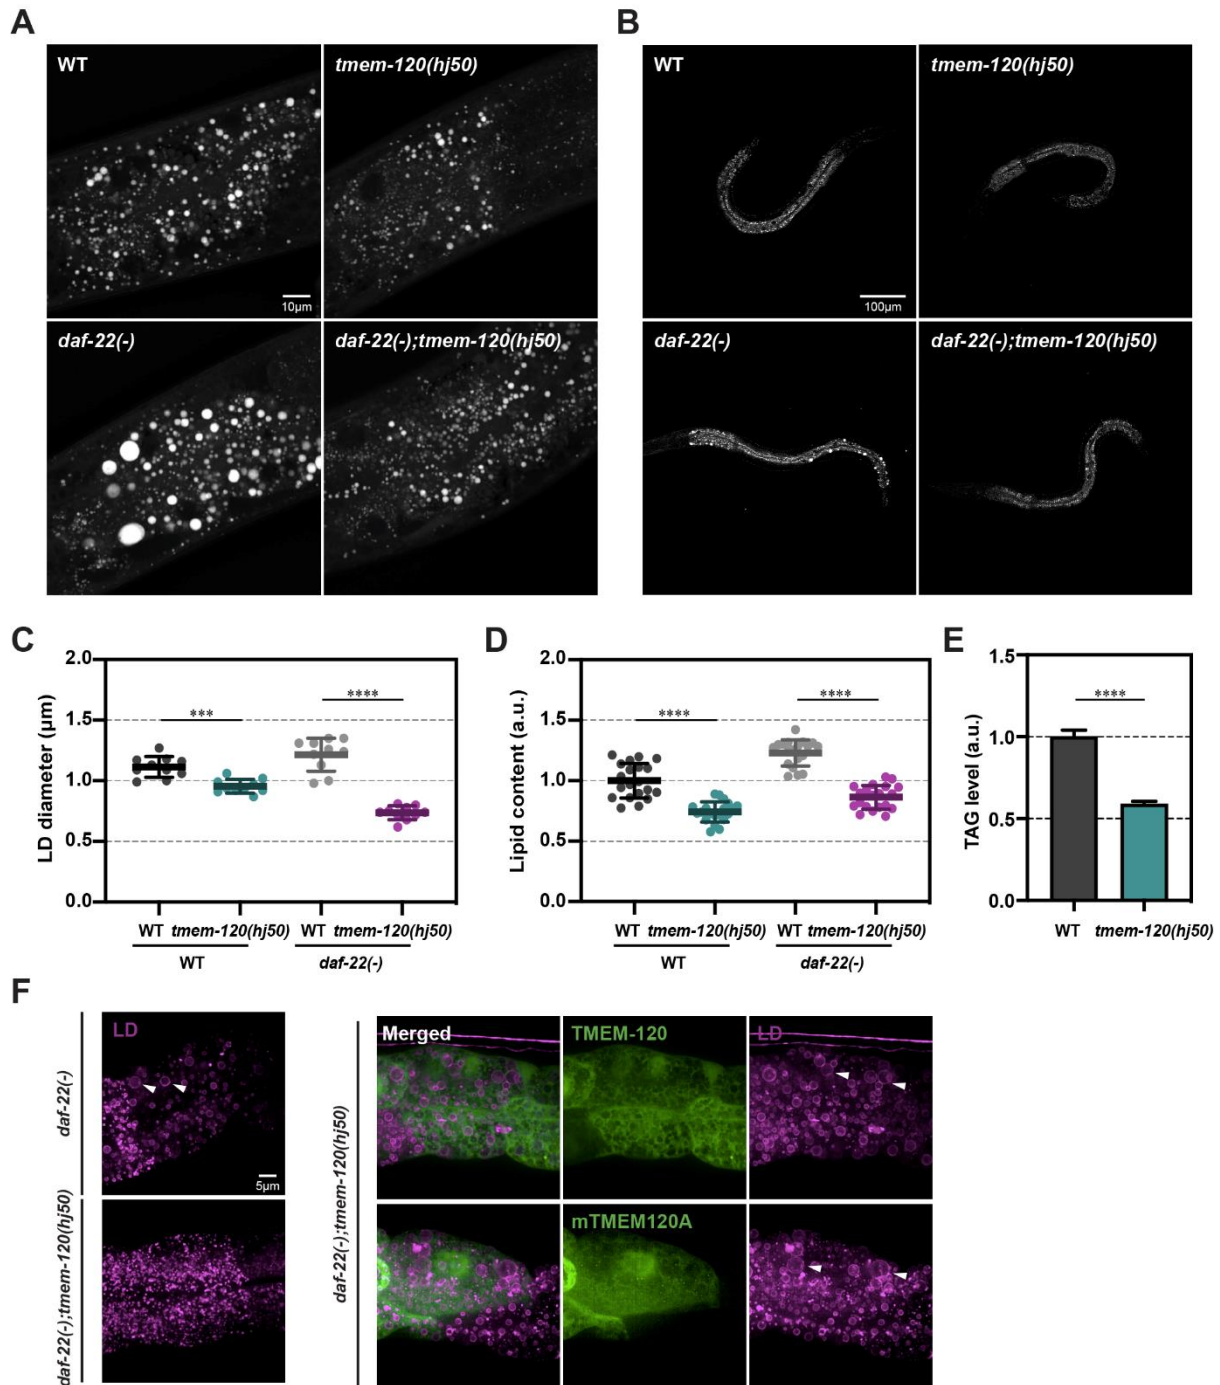

600

601 **Figure 1. TMEM-120 promotes TAG synthesis and LD expansion.** (A) Visualization of  
 602 LDs in wild type (WT), *tmem-120(hj50)*, *daf-22(ok693)* and *daf-22(ok693); tmem-120(hj50)*  
 603 young adult animals by Stimulated Raman Scattering (SRS). Representative images of a  
 604 single focal plane of the first and second intestinal segments are shown. The anterior end of  
 605 the worm is toward the left. For simplicity, *daf-22(ok693)* will be referred to as *daf-22(-)*  
 606 thereafter. (B) As in (A), but with representative images of entire larval stage L4 worms at a  
 607 focal plane with the strongest SRS intensity. (C) Quantification of LD diameter of WT,

608 *tmem-120(hj50)*, *daf-22(-)* and *daf-22(-); tmem-120(hj50)* larval L4 stage worms (n = 10 for  
609 each strain), using DHS-3::mRuby (*hj200*) as a LD marker. Each data point represents the  
610 average LD diameter of an individual worm. Total number of LDs quantified: WT = 2033,  
611 *tmem-120(hj50)* = 1561, *daf-22(-)* = 1331 and *tmem-120(hj50); daf-22(-)* = 1337. (D) Label  
612 free quantification of neutral lipid content by SRS in WT (n=20), *tmem-120(hj50)* (n=20),  
613 *daf-22(-)* (n=19) and *daf-22(-); tmem-120(hj50)* (n=20) worm shown in (B). Each data point  
614 represents neutral lipid content of an individual worm. The mean value of WT worms is  
615 assigned as 1. a.u. = arbitrary unit. (E) Quantification of TAG level in WT and *tmem-*  
616 *120(hj50)* L4 stage animals by LC-MS. Three independent biological samples for each group.  
617 Each group consists of ~2000 worms. The mean value of WT worms is assigned as 1. (F)  
618 Visualization of LDs in L4 stage worms using DHS-3::mRuby (*hj200*) as a LD marker.  
619 Representative images of *daf-22(-)*, *daf-22(-); tmem-120(hj50)*, *daf-22(-); tmem-120(hj50);*  
620 *Ex[vha-6p::tmem-120::sl2::gfp]* and *daf-22(-); tmem-120(hj50); Ex[vha-6p::mouse*  
621 *tmem120A::sl2::gfp]* are shown. The GFP is expressed from the same operon as TMEM-120  
622 or mouse TMEM120A, but not as a fusion protein. Each representative image is a projection  
623 of 7.5 $\mu$ m z stack with the second intestinal segment in the center area. Enlarged LDs are  
624 indicated by white arrowheads. For all graphs, bars or horizontal lines represent mean  $\pm$  SD.  
625 Statistical analysis: (C-D) two-way ANOVA followed by Sidak's multiple comparisons test;  
626 (E) unpaired t test. \*\*\*p < 0.001; \*\*\*\*p < 0.0001.

627

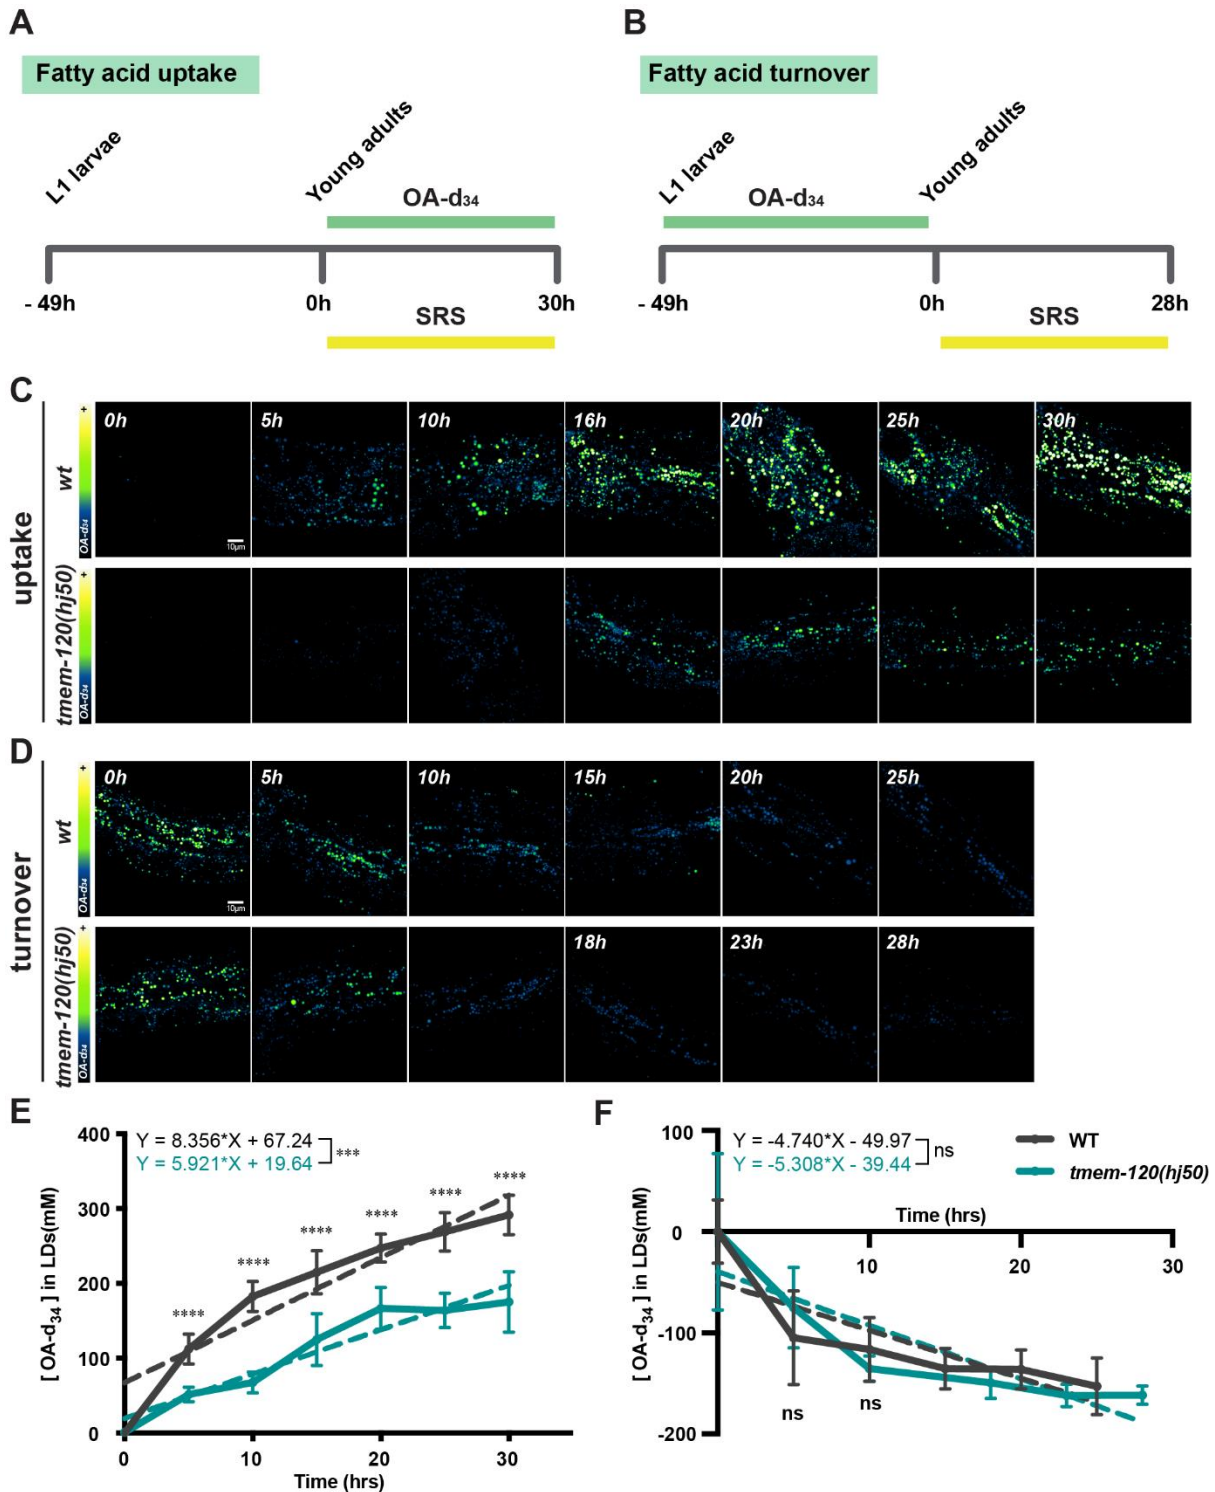

628

629 **Figure 2. TMEM-120 promotes the incorporation of fatty acids into TAG.** (A-B) The  
 630 experimental design for monitoring deuterated oleic acid-d<sub>34</sub> (OA-d<sub>34</sub>) uptake (A) or turnover  
 631 (B). (C-D) Visualization of OA-d<sub>34</sub> incorporation (C) or turnover (D) by SRS in wild type  
 632 (wt) and *tmem-120(hj50)* worms. Representative images of a layer with the strongest SRS  
 633 signal in the first and second intestinal segments are shown. (E) Quantification of OA-d<sub>34</sub>

634 uptake in WT and *tmem-120(hj50)* worms shown in (C). n = 5 to 9 for each group at each  
635 time point. Straight dashed lines and equations were generated based on linear regression  
636 analysis of each group. (F) Quantification of OA-d<sub>34</sub> turnover in WT and *tmem-120(hj50)*  
637 worms shown in (D). n = 7 to 10 for each group at each time point. Statistical analysis:  
638 unpaired t test (for each time point). ns, not significant; \*\*\*p < 0.001.

639

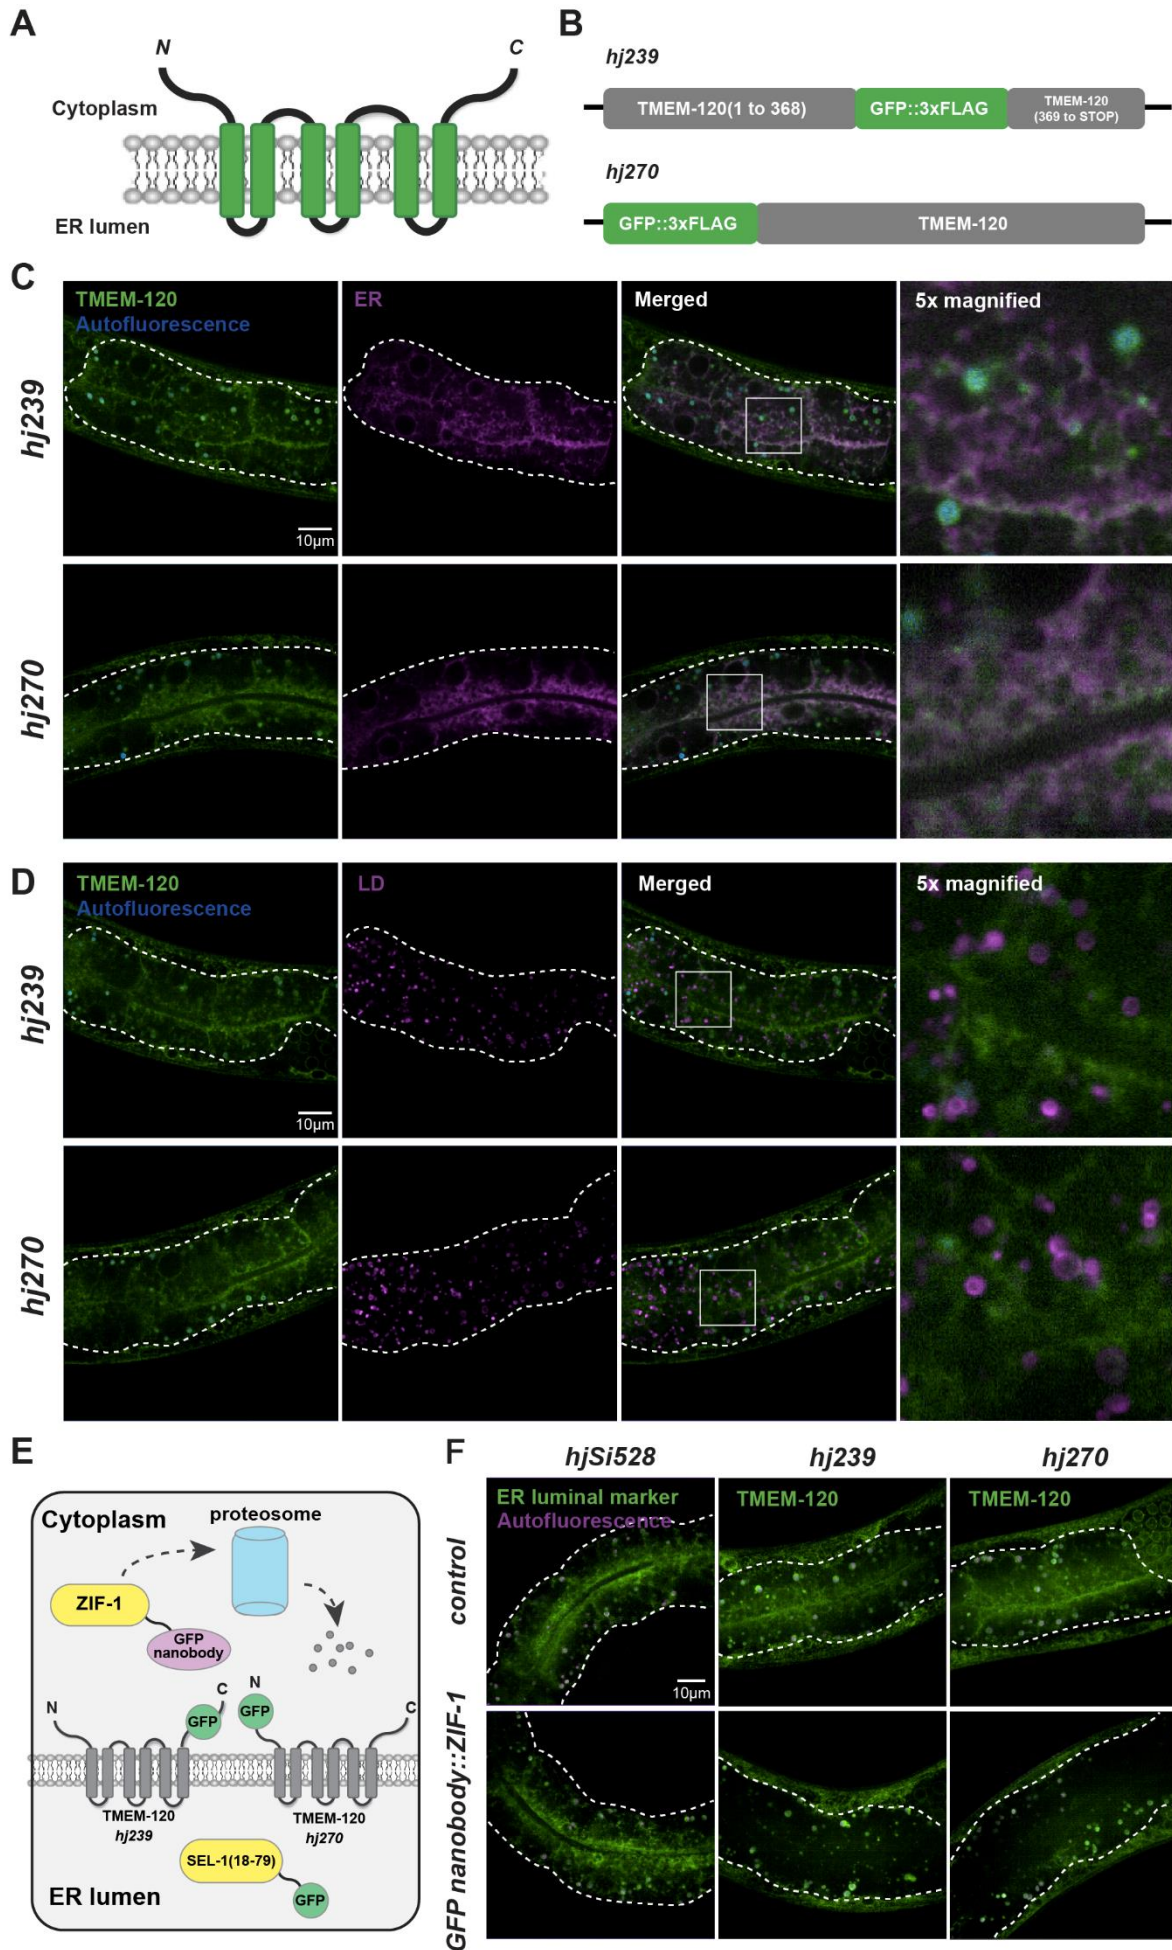

641 **Figure 3. TMEM-120 is an ER resident protein.** (A) The topology of TMEM-120 based on  
642 its homology with TMEM120A. (B) Schematic representation of TMEM-120 GFP fusion  
643 proteins. (C) Visualization of TMEM-120 GFP fusion proteins and an intestinal-specific  
644 luminal ER marker SEL-1(18-79)::mCherry::HDEL (*hjSi158*) in L4 worms. Representative  
645 images of a single focal plane of the first and second intestinal segment are shown. For each  
646 image, the intestine is enclosed by dashed lines. The boxed region in the merged image is 5x  
647 magnified and shown as a separate panel. (D) As in (C), but with an LD marker DHS-  
648 3::mRuby (*hj200*). (E) Schematic diagram on the GFP nanobody::ZIF-1 mediated  
649 degradation of cytoplasmic GFP fusion proteins. GFP targeted to the ER lumen is protected  
650 from degradation. (F) Visualization of an intestinal-specific luminal ER marker SEL-1(18-  
651 79)::GFP::HDEL (*hjSi528*) and TMEM-120 GFP fusion proteins in L4 worms in the absence  
652 (control) or presence of GFP nanobody::ZIF-1 (*hjSi524*). Each representative image is a  
653 projection of 5 $\mu$ m z stack with the second intestinal segment in the center. The intestine is  
654 enclosed by dashed lines. GFP signals in the hypodermis (regions outside the dashed lines)  
655 were unaffected by GFP nanobody::ZIF-1.

656

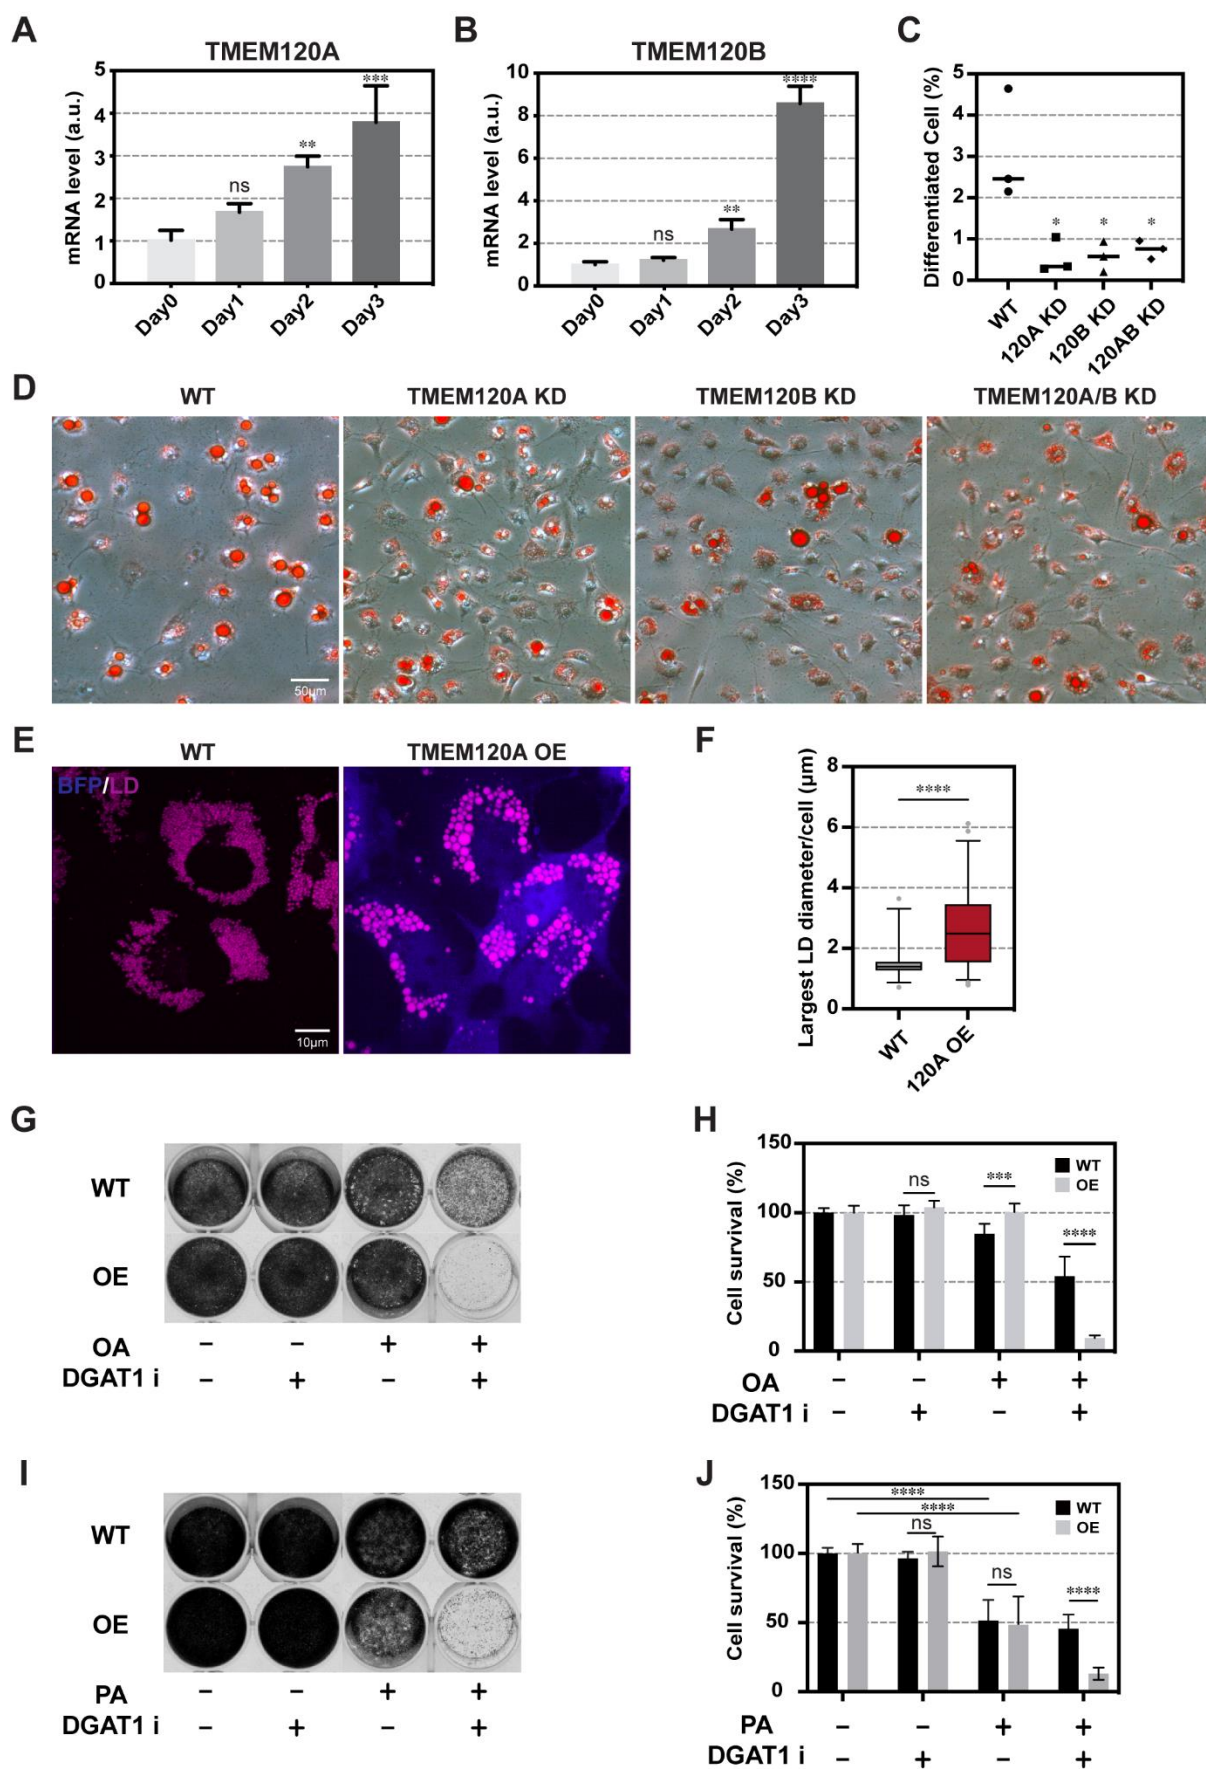



658 **Figure 4. TMEM120A promotes adipogenesis and LD expansion in mammalian cells.**

659 (A-B) The expression level of TMEM120A and TMEM120B during OP9 pre-adipocyte  
660 differentiation measured by real time PCR. Mean + SD from three independent samples is  
661 shown. (C) Quantification of mature OP9 adipocytes (at least one LD >15 $\mu$ m / cell). Data  
662 summarized from three independent experiments. Each data point represents the percentage  
663 of mature adipocytes in one experiment. Total number of cells analyzed: WT, 4988 cells;  
664 TMEM120A KD, 5216 cells; TMEM120B KD, 6107 cells; TMEM120A+TMEM120B KD:  
665 3898 cells. Horizontal line represents the mean. (D) Visualization of LDs in differentiated  
666 WT, TMEM120A KD, TMEM120B KD, and TMEM120A/B KD OP9 cells by Oil Red O  
667 staining. (E) Visualization of LDs in oleic acid treated wild type (WT) and TMEM120A  
668 overexpressing (OE) COS7 cells with FAS lipid droplet dye. Three independent experiments  
669 were performed. Each representative image is a projection of 5.5 $\mu$ m (WT) or 6.5 $\mu$ m (OE) z  
670 stack. (F) Quantification of the largest LD diameter of oleic acid treated WT and  
671 TMEM120A OE COS7 cells. Three independent experiments were performed. Total number  
672 of cells analyzed: WT: 183 cells. OE: 239 cells. (G) Assessment of cell survival by crystal  
673 violet staining after 20 hours of oleic acid (OA) and DGAT1 inhibitor (DGAT1i, A922500)  
674 treatment. Solvent control: ethanol (oleic acid) and DMSO (DGAT1i). (H) Quantification of  
675 cell survival, based on extracted crystal violet from (G). Data summarized from 9  
676 independent wells, performed on 3 separate days, for each cell line. Mean + SD is shown. (I)  
677 As in (G), but with palmitic acid (PA). (J), As in (H), but with cells treated with palmitic acid  
678 (PA). Statistical analysis: (A-B) One-way ANOVA followed by Dunnett's multiple  
679 comparisons test; (C and F) unpaired t test; (H-J) multiple t-test. ns, not significant; \*p<0.05;  
680 \*\*p<0.01; \*\*\*p<0.001; \*\*\*\*p<0.0001.

**A**

```

C. elegans 1 - - - - -MATEKLDSEWKLVQDDFQKLEKIHDEYIQKSRQVSKFQETAGKAMKHNNYLKLNKE TMRQAQSSAEKLD EADTSKTDVLSHVAKLREEL 90
Mouse 1 MQSPPPDPLGDCLRNWEDLQDDFQGIQETHRLYRLKLEELTKLQANCTNSITRQKRLQELALVLKCKRPSL - - - - -P - - - - -SESMEAAQEL ENQM 87
Human 1 MQPPPPGPLGDCLRDWEDLQDDFQNIQETHRLYRLKLEELTKLQNNCTSSITRQKRLQELALALKCKKPSL - - - - -P - - - - -AEAEAAQEL ENQM 87

C. elegans 91 AVANLRIRDMQGE LPAQTNGFYLNLI LGSNLNVSLLTKAEKFKYKQEYEGFKWSITILIC-LLALCAWIWFRVFDLSLCFLMVWYCTLTIRESV 185
Mouse 88 KERQGLFFDMEAYL - PKKNGLYLSLVLG - NVNVTL LSKQAKFAYKDEYEFKLYLTIILIVISFTQRFLNLSRVTDAAFNFLVWYCTLTIRESI 181
Human 88 KERQGLFFDMEAYL - PKKNGLYLSLVLG - NVNVTL LSKQAKFAYKDEYEFKLYLTIILILISFTQRFLNLSRVTDAAFNFLVWYCTLTIRESI 181

          hj49(G195E)

C. elegans 186 LRVNGSKIKGWWLSHHYLSCAVPGIVLTWKDGLCYQEFRPYFLIFTFYISLVQLAQNYQSGCLRRHS LGQGHQMDITVEGFTSWQFKGLTFLLP 281
Mouse 182 LIINNGSRIKGWWVFHHYVSTFLSGVMLTWPDGLMYQKFRNQFLSFSMYQSFVQFLQYYYQSGCLYLRALGERHTMDLTVEGFQSWMWRGLTFLLP 277
Human 182 LIINNGSRIKGWWVFHHYVSTFLSGVMLTWPDGLMYQKFRNQFLSFSMYQSFVQFLQYYYQSGCLYLRALGERHTMDLTVEGFQSWMWRGLTFLLP 277

          hj50(Q290*)

C. elegans 282 FLA FGYLYQLYLAWK LFGYTNS ETC DGI MQVWTL SLL LGL IAGNIVIT TSMVCIRKFKTSTSYTNIVTLTRKYSSRRNIREAPPTPELLRGAPPPP 377
Mouse 278 FLFFGHFWQLFNALTLFNLRADPECKE - WQVLMCGFPFLLLFLGNFFTL LRVVHQK FHSQGHGNKKD - - - - - 343
Human 278 FLFFGHFWQLFNALTLFNLRADPQCKE - WQVLMCGFPFLLLFLGNFFTL LRVVHHK FHSQRHGSKKD - - - - - 343

C. elegans 378 TGKHLHLH
Mouse
Human
    
```

**B**

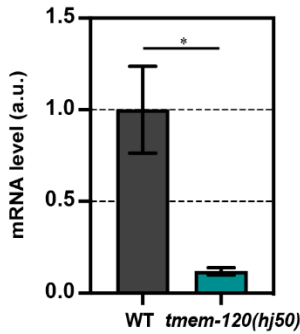

**C**

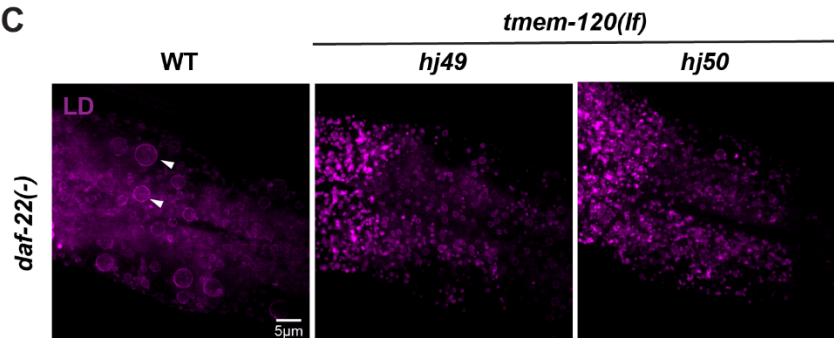

**D**

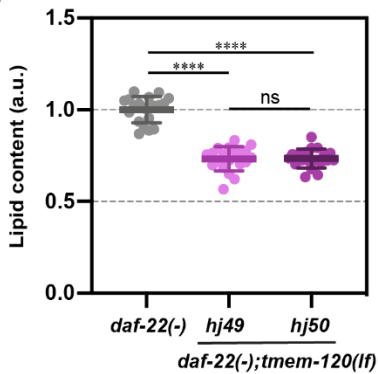

**E**

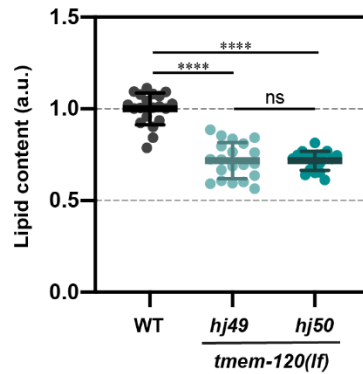

**F**

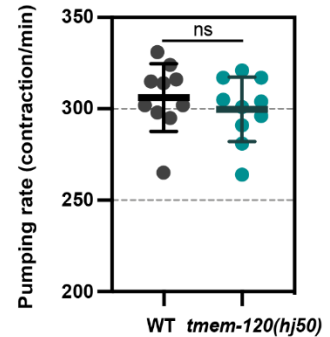

681

682 **Figure S1. TMEM-120 promotes LD expansion.** (A) Sequence alignment of *C. elegans*  
 683 TMEM-120, mouse TMEM120A and human TMEM120A. Identical residues are shaded in  
 684 grey. The mutated residues encoded by *tmem-120(hj49)* and *tmem-120(hj50)* are labeled red.  
 685 (B) Expression level of *tmem-120* in wild type (WT) and *tmem-120(hj50)* L4 stage worms  
 686 measured by real time PCR. Two independent samples for each strain. The mean value of  
 687 WT is set as 1 for comparison. (C) Visualization of LDs in *daf-22(-)*, *daf-22(-); tmem-*  
 688 *120(hj49)* and *daf-22(-); tmem-120(hj50)* larval L4 stage worms using DHS-3::mRuby  
 689 (*hj200*) as a LD marker. Each representative image is a projection of 7.5µm z stack with the  
 690 second intestinal segment in the center. Enlarged LDs are indicated by white arrowheads. (D)

691 Label free quantification of neutral lipid content in *daf-22(-)* (n=20), *daf-22(-); tmem-*  
692 *120(hj49)* (n=20) and *daf-22(-); tmem-120(hj50)* (n=19) L4 stage worms by SRS. Each data  
693 point represents the neutral lipid content of an individual worm. (E) As in (D), but with WT  
694 (n=20), *tmem-120(hj49)* (n=20) and *tmem-120(hj50)* (n=19) L4 stage worms. (F) Pharyngeal  
695 pumping rate of WT (n=10) and *tmem-120(hj50)* (n=10) 1-day old adult worms. Each data  
696 point represents the contraction rate of an individual worm. For all graphs, bars or horizontal  
697 lines represent mean  $\pm$  SD. Statistical analysis: (B and F) unpaired t test; (D and E) one-way  
698 ANOVA followed by Tukey's multiple comparisons test. a.u., arbitrary unit. ns, not  
699 significant; \* $p < 0.05$ ; \*\*\*\* $p < 0.0001$ .

700

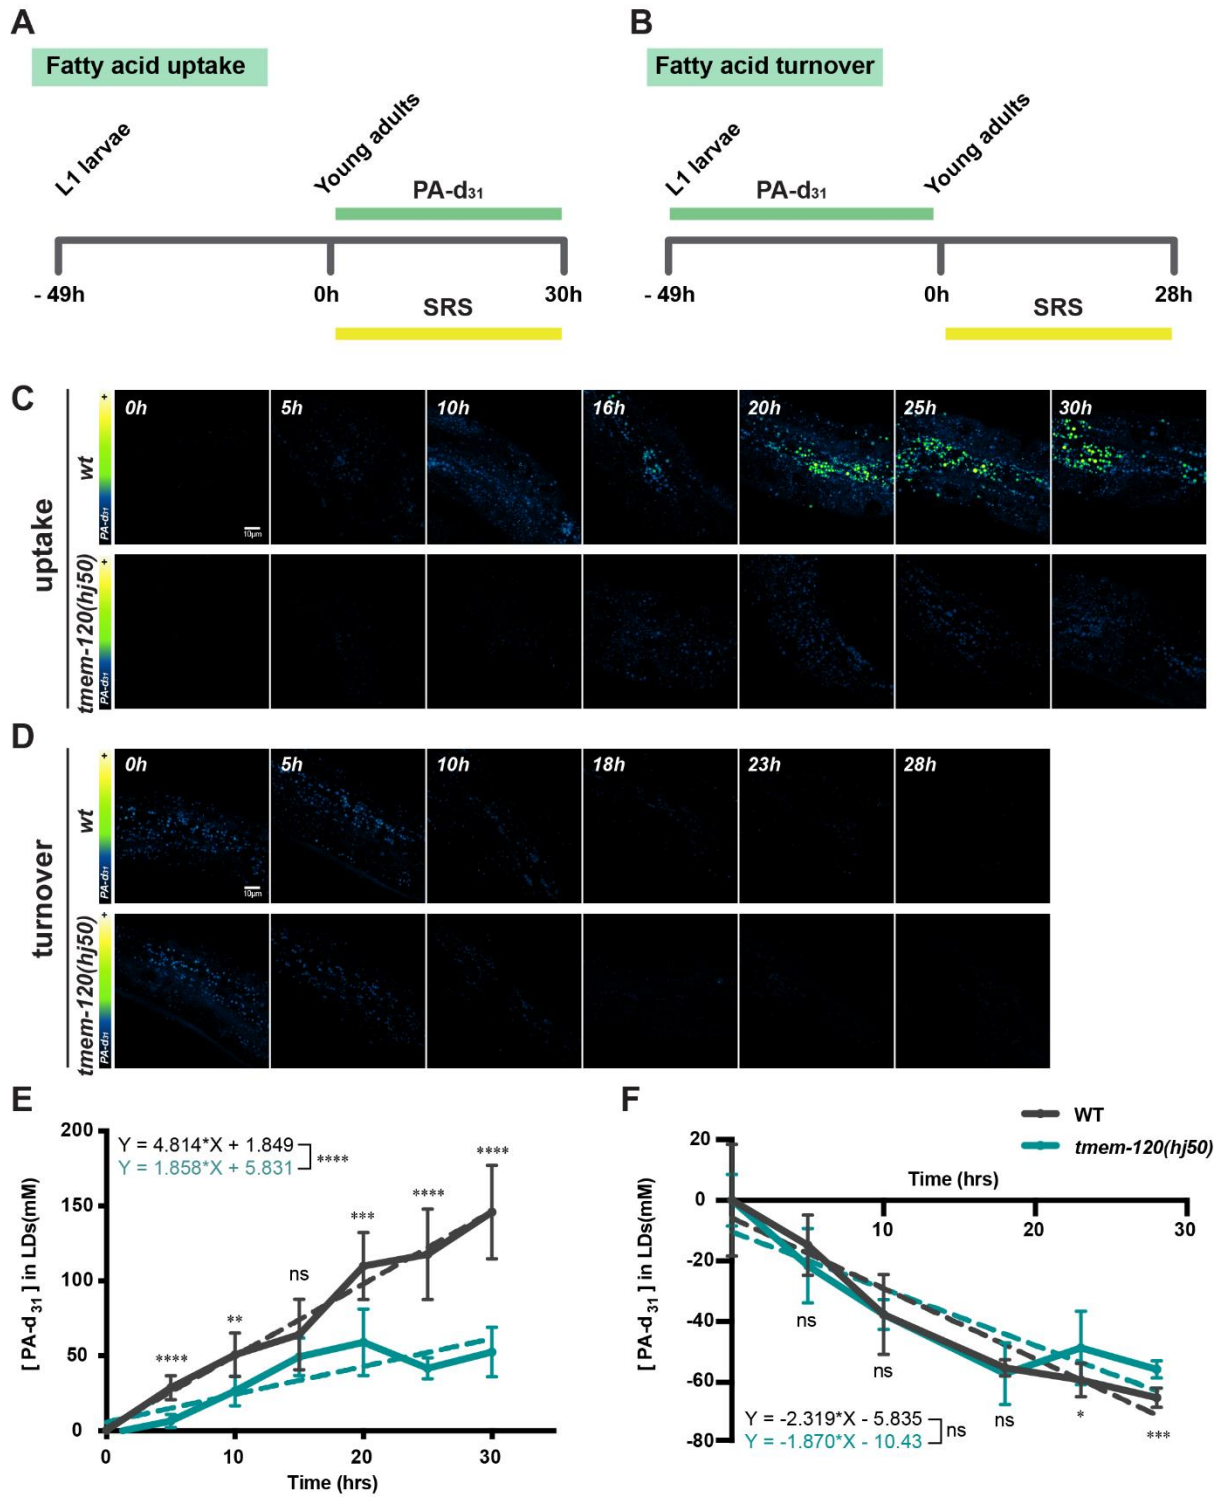

701

702 **Figure S2. TMEM-120 promotes the incorporation of fatty acids into TAG.** (A-B) The  
 703 experimental design for monitoring deuterated palmitic acid-d<sub>31</sub> (PA-d<sub>31</sub>) uptake (A) or  
 704 turnover (B). (C-D) Visualization of PA-d<sub>31</sub> incorporation (C) or turnover (D) by SRS in wild  
 705 type (wt) and *tmem-120(hj50)* worms. Representative images of a layer with the strongest  
 706 SRS signal in the first and second intestinal segments are shown. (E) Quantification of PA-

707  $d_{31}$  uptake in WT and *tmem-120(hj50)* worms shown in (C). n = 5 to 9 for each group at each  
708 time point. Straight dashed lines and equations were generated based on linear regression  
709 analysis of each group. (F) Quantification of PA- $d_{31}$  turnover in WT and *tmem-120(hj50)*  
710 worms shown in (D). n = 4 to 9 for each group at each time point. Statistical analysis:  
711 unpaired t test (for each time point). ns, not significant; \*p < 0.05; \*\*p < 0.01; \*\*\*p <  
712 0.001; \*\*\*\*p < 0.0001.

713

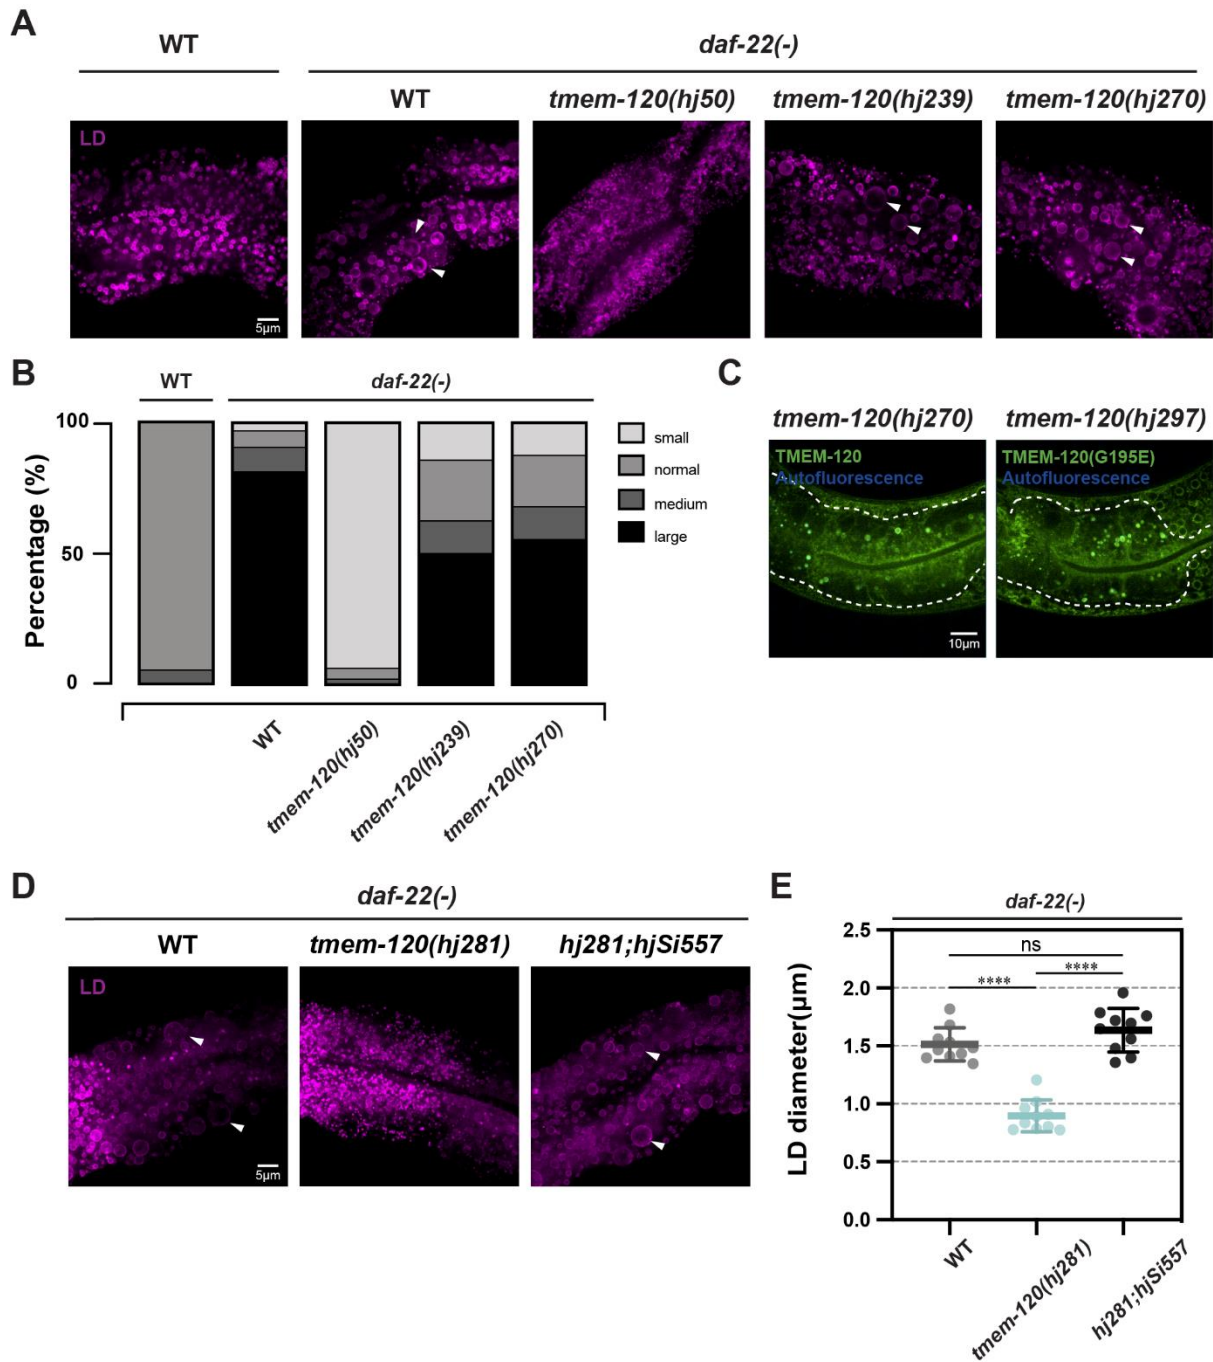

714

715 **Figure S3. Functional characterization of TMEM-120 GFP fusion proteins. (A)**

716 Visualization of LDs in wild type (WT), *daf-22(-)*, *daf-22(-); tmem-120(hj50)*, *daf-22(-);*

717 *tmem-120(hj239)* and *daf-22(-); tmem-120(hj270)* L4 stage worms, using DHS-3::mRuby

718 (*hj200*) as a LD marker. Each representative image is a projection of 7.5µm z stack with the

719 second intestinal segment in the center. Enlarged LDs are indicated by white arrowheads. (B)

720 Quantification of percentage of WT (n=57), *daf-22(-)* (n=64), *daf-22(-); tmem-120(hj50)*

721 (n=48), *daf-22(-); tmem-120(hj239)* (n=56) and *daf-22(-); tmem-120(hj270)* (n=56) 5-day old

722 adult worms with small ( $D_L < 1.0\mu\text{m}$ ), normal ( $1.0\mu\text{m} < D_L < 3\mu\text{m}$ ), medium ( $3\mu\text{m} < D_L <$

723 5 $\mu$ m) and large (5 $\mu$ m < D<sub>L</sub>) LDs. D<sub>L</sub>, diameter of the largest LD in the second intestinal  
724 segment of an individual worm. Data combined from 3 independent groups of worms (n = 14  
725 to 22 for each group) for each strain. (C) Visualization of GFP::*TMEM-120* (*hj270*) and  
726 GFP::*TMEM-120*(G195E) (*hj297*) in L4 stage worms. Representative images of a single  
727 focal plane of the first and second intestinal segments are shown. The intestine is enclosed by  
728 dashed lines. (D) Visualization of LDs in *daf-22(-)* and *daf-22(-); tmem-120(hj281)* and *daf-*  
729 *22(-); tmem-120(hj281); hjSi557[vha-6p::*gfp>::tmem-120]* L4 stage worms, using DHS-  
730 3::*mRuby* (*hj200*) as a LD marker. *tmem-120(hj281)* was generated by Cre-loxP based  
731 excision of *tmem-120(hj239)*. Each representative image is a projection of 7.5 $\mu$ m z stack with  
732 the second intestinal segment in the center. Enlarged LDs are indicated by white arrowheads.  
733 (E) Quantification of LD size of worms from (D). Each data point represents average LD  
734 diameter of an individual worm. Total number of LDs quantified: *daf-22(-)* = 1276, *daf-22(-);*  
735 *tmem-120(hj281)* = 1216 and *daf-22(-); tmem-120(hj281); hjSi557* = 1279. Horizontal bars  
736 represent mean  $\pm$  SD. Statistical analysis: one-way ANOVA followed by Tukey's multiple  
737 comparisons test. ns, not significant; \*\*\*\*p < 0.0001.*

738

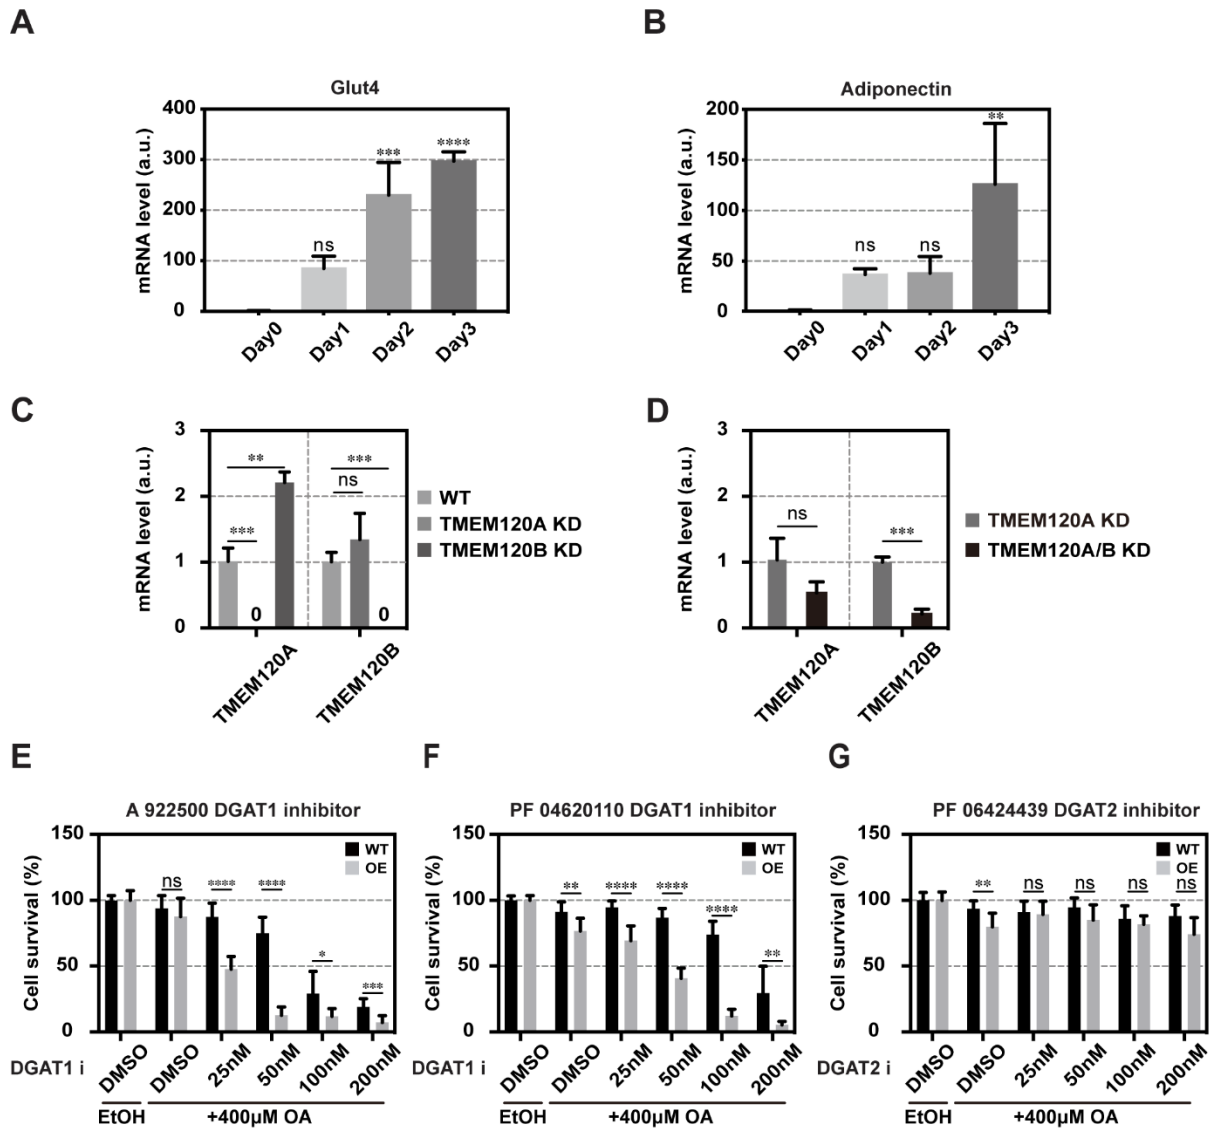

739

740 **Figure S4. TMEM120A acts upstream of DGAT1 in mammalian cells.** (A-B) The  
 741 expression level of mature adipocyte markers Glut4 and Adiponectin during OP9 pre-  
 742 adipocyte differentiation measured by real time PCR. Mean + SD from three independent  
 743 samples is shown. The mean value on Day 0 is set as 1. a.u., arbitrary unit. (C) The  
 744 expression level of TMEM120A and TMEM120B in wild type (WT), TMEM120A KD,  
 745 TMEM120B KD cells, measured by real time PCR. Mean + SD from three independent  
 746 samples of each cell line is shown. The mean value of WT cells is set as 1. (D) The  
 747 expression level of TMEM120A and TMEM120B in TMEM120A KD (parental to the double  
 748 KD cells) and TMEM120A+TMEM120B KD cells, measured by real time PCR. Mean + SD  
 749 from three independent samples of each cell line is shown. The mean value of TMEM120A  
 750 KD cells is set as 1. (E) Quantification of cell survival for WT and TMEM120A  
 751 overexpressing (OE) COS7 cells treated with oleic acid (OA) and increasing concentration of



752 DGAT1 inhibitor (A922500), based on crystal violet staining. Solvent control: ethanol (oleic  
753 acid) and DMSO (DGAT1i). Data summarized from 9 independent wells, performed on 3  
754 separate days, for each cell line. Mean + SD is shown. (F) As in (E), but with DGAT1  
755 inhibitor (PF 04620110). (G) As in (E), but with DGAT2 inhibitor (PF06424439). Statistical  
756 analysis: (A-B) One-way ANOVA followed by Dunnett's multiple comparisons test. (C-D)  
757 unpaired t-test; (E-G) multiple t-test. ns, not significant; \* $p < 0.05$ ; \*\* $p < 0.01$ ; \*\*\* $p < 0.001$ ;  
758 \*\*\*\* $p < 0.0001$ .
